# Supplementary material
Source: publisher figshare collection journal article supplement (https://acs.figshare.com/ndownloader/files/12745571)
Supplement: Supplementary file 1 [file 12745571]

Supporting Information for:

## Unraveling the Ground State and Excited State Structures and Dynamics of Hydrated $\text{Ce}^{3+}$ Ions by Experiment and Theory

Patric Lindqvist-Reis,<sup>\*†</sup> Florent Réal,<sup>\*‡</sup> Rafał Janicki<sup>||</sup>, and Valérie Vallet,<sup>\*‡</sup>

<sup>†</sup> Institute for Nuclear Waste Disposal, Karlsruhe Institute of Technology, P.O. Box 3640, 76021 Karlsruhe, Germany

<sup>‡</sup> Univ. Lille, CNRS, UMR 8523 - PhLAM - Physique des Lasers Atomes et Molécules, F-59000 Lille, France

<sup>||</sup> University of Wrocław, Faculty of Chemistry, F. Joliot-Curie 14, 50-383 Wrocław, Poland

## Table of Contents

|                                                                               |    |
|-------------------------------------------------------------------------------|----|
| 1. Methods.....                                                               | 2  |
| <b>1.1. Sample Preparation</b> .....                                          | 2  |
| 1.1.1. Chemicals.....                                                         | 2  |
| 1.1.2. Solutions. ....                                                        | 2  |
| 1.1.3. Solids: .....                                                          | 3  |
| <b>1.2. Crystallography</b> .....                                             | 3  |
| 1.2.1. Single Crystal X-ray Diffraction.....                                  | 3  |
| <b>1.3. UV-vis Absorption Spectroscopy</b> .....                              | 4  |
| <b>1.4. Time-Resolved Laser Fluorescence Spectroscopy (TRLFS)</b> .....       | 4  |
| <b>1.5. Fluorescence Excitation Spectra</b> .....                             | 4  |
| <b>1.6. Quantum Chemical Methods</b> .....                                    | 4  |
| 1.6.2. Electronic spectra calculations.....                                   | 5  |
| 1.6.3. QTAIM analysis.....                                                    | 5  |
| <b>2. Supporting Information for the Results and Discussion Section</b> ..... | 6  |
| <b>2.1. Absorption Spectra</b> .....                                          | 6  |
| 2.1.1. Absorption Spectra of 2 and 4 at 295 and 4 K. ....                     | 6  |
| 2.1.2. Absorption vs. Excitation Spectra.....                                 | 6  |
| 2.1.3. Thermodynamics of the Hydration Equilibrium.....                       | 6  |
| 2.1.4. Experimental Stokes Shift.....                                         | 7  |
| 2.1.5. Luminescence Spectra and Lifetimes.....                                | 8  |
| 2.1.6. Theoretical Structures.....                                            | 8  |
| 2.1.7. Theoretical Absorption Spectra.....                                    | 8  |
| 2.1.8. About Tables S7-S12.....                                               | 9  |
| 2.2. Figures (S1-S13).....                                                    | 10 |
| 2.3. Tables (S1-S18).....                                                     | 21 |
| 3. References.....                                                            | 31 |

## 1. Methods

### 1.1. Sample Preparation

*1.1.1. Chemicals.* CeCl<sub>3</sub>·7H<sub>2</sub>O (99.99 % Sigma-Aldrich), LaCl<sub>3</sub>·7H<sub>2</sub>O (99.99 % Sigma-Aldrich), YCl<sub>3</sub>·6H<sub>2</sub>O (99.99 % Sigma-Aldrich), La<sub>2</sub>O<sub>3</sub> (99.99 %, Alfa Aesar), Ba(BrO<sub>3</sub>)<sub>2</sub> (Sigma-Aldrich), HCl (37%, puriss. p.a., Sigma-Aldrich), HClO<sub>4</sub> 70% (70.0-72.0%, puriss. p.a., Sigma-Aldrich), H<sub>2</sub>SO<sub>4</sub> (puriss. p.a., 95-97%, Merck), HCF<sub>3</sub>SO<sub>3</sub> (100 % Sigma-Aldrich), 15-crown-5 (98%, Sigma-Aldrich).

*1.1.2. Solutions.* A stock solution of 0.1 M CeCl<sub>3</sub> in 0.1 M HCl was prepared by dissolving weighted amounts of crystalline CeCl<sub>3</sub>·7H<sub>2</sub>O (99.99 %; Sigma-Aldrich) in 1 M HCl and dilution with water to 0.1 M. Aliquots of this stock solution were used to produce the more diluted aqueous Ce(III) solutions or to ‘spike’ the crystalline model compounds with Ce<sup>3+</sup>.

**1.1.3. Solids: [La(H<sub>2</sub>O)<sub>9</sub>](BrO<sub>3</sub>)<sub>3</sub> (1).** An acidified (pH ~1) 0.5 M La<sub>2</sub>(SO<sub>4</sub>)<sub>3</sub> aqueous solution was obtained by dissolving La<sub>2</sub>O<sub>3</sub> in H<sub>2</sub>SO<sub>4</sub>. Equimolar amounts of this solution and a Ba(BrO<sub>3</sub>)<sub>2</sub> solution were mixed under stirring. The produced BaSO<sub>4</sub> precipitate was filtered off to give a clear solution. Several aliquots of this solution were spiked with CeCl<sub>3</sub> to give Ce:La molar ratios between 0.01 and 0.001%. Hexagonal rod-like crystals of **1** were formed from these solutions upon slow dehydration at room temperature.

**[La(H<sub>2</sub>O)<sub>9</sub>](CF<sub>3</sub>SO<sub>3</sub>)<sub>3</sub> (2).** An acidified (pH ~1) 0.2 M La(CF<sub>3</sub>SO<sub>3</sub>)<sub>3</sub> aqueous solution was obtained by dropwise addition of concentrated HCF<sub>3</sub>SO<sub>3</sub> (100%; Sigma-Aldrich) to a slurry of La<sub>2</sub>O<sub>3</sub> in water until the solution becomes clear. The solution was filtered to remove undissolved lanthanum oxide particles (if present). Aliquots of this solution were spiked with the Ce<sup>3+</sup> stock solution to give Ce:La molar ratios between 0.01 and 0.001. Hexagonal rod-like crystals of **2** were grown from these solutions upon slow dehydration at room temperature.

**[La(H<sub>2</sub>O)<sub>7</sub>Cl<sub>2</sub>]<sub>2</sub>Cl<sub>2</sub> (3).** 0.40 g (1.08 mmol) LaCl<sub>3</sub>·7H<sub>2</sub>O (i.e. [La(H<sub>2</sub>O)<sub>7</sub>Cl<sub>2</sub>]<sub>2</sub>Cl<sub>2</sub>) was dissolved in 0.1 M HCl and spiked with the cerium stock solution. Slow evaporation at room temperature yielded Ce<sup>3+</sup>-doped crystals of **3**.

**Y(H<sub>2</sub>O)<sub>8</sub>]Cl<sub>3</sub>·15-crown-5 (4).** 0.40 g (1.32 mmol) YCl<sub>3</sub>·6H<sub>2</sub>O was dissolved in 15 ml CH<sub>3</sub>CN:CH<sub>3</sub>OH 3:1. The solution was spiked with the cerium stock solution and heated to 60 °C. 0.29 g 1.32 mmol 15-crown-5 was dissolved in 5 ml CH<sub>3</sub>CN:CH<sub>3</sub>OH 3:1. This solution was added dropwise to the YCl<sub>3</sub> solution. The clear solution was covered and placed in the freezer. After ca. 2-3 days, colorless, plate-like crystals of **4** had formed.

**[Ce(H<sub>2</sub>O)<sub>7</sub>Cl]Cl<sub>2</sub>·15-crown-5·H<sub>2</sub>O (5).** The procedure is similar to that of **4**. 0.40 g (1.07 mmol) CeCl<sub>3</sub>·7H<sub>2</sub>O was dissolved in 15 ml CH<sub>3</sub>CN:CH<sub>3</sub>OH 3:1. The solution was spiked with the cerium stock solution and heated to 60 °C. 0.24 g 1.07 mmol 15-crown-5 was dissolved in 5 ml CH<sub>3</sub>CN:CH<sub>3</sub>OH 3:1. This solution was added dropwise to the YCl<sub>3</sub> solution. The clear solution was covered and placed in the freezer. After ca. 2-3 days, colorless, plate-like crystals had formed.

**[Y(H<sub>2</sub>O)<sub>6</sub>Cl<sub>2</sub>]Cl (6).** 0.40 g (1.32 mmol) YCl<sub>3</sub>·6H<sub>2</sub>O (i.e. [Y(H<sub>2</sub>O)<sub>6</sub>Cl<sub>2</sub>]Cl) was dissolved in 0.1 M HCl and spiked with the cerium(III) stock solution. Slow evaporation at room temperature yielded Ce<sup>3+</sup>-doped crystals of **6**.

## 1.2. Crystallography

**1.2.1. Single Crystal X-ray Diffraction.** The crystal systems and the unit cell dimensions of the produced crystalline model compounds **1-4** and **6** were checked by single crystal X-ray diffraction methods with a Kuma KM4 diffractometer; they were found to be in agreement with the reported structures.<sup>1</sup> A single crystal of **5** of suitable size was cut from a larger crystal and mounted on a Kuma KM4 diffractometer equipped with a CCD counter. Data were corrected for polarization, Lorentz, and absorption (calculated from the crystal habit derived from photo scans). The position of the cerium atom was located from Patterson maps; all other atoms but hydrogen were derived from difference Fourier maps. The positions of all carbon-bonded hydrogen atoms were calculated geometrically. The refinement was done on the full-matrix with all of non-hydrogen atoms described anisotropically using the SHELXS97 and SHELXL-2018/1 programs.<sup>2</sup> The molecular structures depicted in Figure 1 and Figure S1 are drawn using the program DIAMOND 2.1, Crystal Impact GbR, 2001.

### 1.3. UV-vis Absorption Spectroscopy

Absorption spectra of the solids and the solutions were recorded with a Cary 5000 UV-Vis-NIR spectrophotometer. The solutions were measured in a 1 cm quartz cuvette at defined temperatures between 10-90 °C, controlled by a TC 125 in TLC 50 E temperature control unit. Compounds **2** and **4** were also measured at liquid helium temperature using an Oxford cryostat.

### 1.4. Time-Resolved Laser Fluorescence Spectroscopy (TRLFS)

TRLFS was performed using the fourth harmonic 266 nm of a Nd-YAG (Continuum Minilite Laser) laser system with a repetition rate of 10 Hz. The laser energy was about 1 mJ. Emission spectra were recorded in the range 290-440 nm. After spectral decomposition by a spectrograph (Shamrock 303i) with a 400 lines mm<sup>-1</sup> grating the spectra were recorded using an ICCD camera (iStar Gen III, ANDOR) containing an integrated delay controller. The gate delay was 10 ns and the gate width 1000 ns. For luminescence lifetime the delay time was scanned with an interval of 6 ns. The lifetime  $\tau$  was obtained by fitting the integrated intensity ( $I$ ) at time  $t$  after the pulse to  $I(\lambda) = I_0(\lambda) \exp(-t/\tau)$ , where  $I_0$  is the intensity at  $t = 0$ . In all the samples the emission decays were monoexponential (Figure S7).

### 1.5. Fluorescence Excitation Spectra

Fluorescence excitation spectra were obtained with the aid of an AB2 Aminco-Bowman Series 2 luminescence spectrometer equipped with a 7 W xenon lamp. The samples were contained in 1 cm quartz cuvettes.

### 1.6. Quantum Chemical Methods

*1.6.1. Geometries of the Model Structures for the Quantum Chemical Calculations.* To compute the vertical excitation energies of Ce<sup>3+</sup> aqua species in different local hydration environments the following molecules species were constructed: [Ce(H<sub>2</sub>O)<sub>8</sub>]<sup>3+</sup>, [Ce(H<sub>2</sub>O)<sub>9</sub>]<sup>3+</sup>, [Ce(H<sub>2</sub>O)<sub>9</sub>]<sup>3+</sup>·(H<sub>2</sub>O)<sub>18</sub>, [Ce(H<sub>2</sub>O)<sub>6</sub>Cl<sub>2</sub>]<sup>+</sup>, [Ce(H<sub>2</sub>O)<sub>7</sub>Cl]<sup>2+</sup>, and [Ce(H<sub>2</sub>O)<sub>7</sub>Cl<sub>2</sub>]<sup>+</sup>. The geometries corresponding to the models **1a,b,c-6a,b,c** are taken from the ‘neat’ crystal structures of **1-6** and either scaled to obtain a near-equilibrium structure of the doped Ce<sup>3+</sup> ion (**1a-6a**), expanded (**1b-6b**), or reduced (**1c-6c**) in size. The near-equilibrium structures are obtained by scaling according to the difference in ionic radii between the host metal ion, La<sup>3+</sup> or Y<sup>3+</sup>, and Ce<sup>3+</sup>. The purpose of the expanded and reduced structures is to study the influence of the cerium-ligand bond distances on the computed absorption spectra.

To optimize the geometries of the lowest excited 5d<sup>1</sup> electronic states of the nonaqua ion [Ce(H<sub>2</sub>O)<sub>9</sub>]<sup>3+</sup> time-dependent density functional theory (TD-DFT) calculations with the PBE0 functional<sup>3</sup> and excited states gradient calculations<sup>4</sup> have been performed using the parallel resolution of the identity approximation for the Coulomb,<sup>5</sup> with the appropriate atomic auxiliary basis functions.<sup>6,7</sup> The PBE0 functional was found to be accurate enough to reproduce the multi-state CASPT2 (complete active space perturbation theory at 2nd order),<sup>8-</sup><sup>10</sup> MS-CASPT2 4f<sup>1</sup>-5d<sup>1</sup> electronic absorption transition energies of the [Ce(H<sub>2</sub>O)<sub>9</sub>]<sup>3+</sup> ion (see

Table S18) and preventing ligand-to-metal charge-transfer transitions to spuriously occur in the  $5d^1$  excited states manifold (neither did it occur in the wave-function calculations). In these calculations, the cerium atom was described by a small-core relativistic pseudopotential<sup>11</sup> with the corresponding def2-TZVP basis set.<sup>12</sup> All oxygen and hydrogen atoms, and chlorine ions were described with aug-cc-pVTZ basis sets.<sup>13,14</sup> The calculations were performed with the TURBOMOLE 7.1 quantum chemistry package.<sup>15</sup>

*1.6.2. Electronic spectra calculations.* For the calculations of spectra, the oxygen, hydrogen and chlorine basis sets are unchanged, but an all-electron atomic natural orbitals relativistic core correlation basis sets (ANO-RCC) with (25s22p15d11f4g) primitive functions contracted to quadruple-quality size [9s8p5d4f3g], was used to describe cerium. Scalar relativity was included through the second-order Douglas-Kroll-Hess Hamiltonian.<sup>16</sup> The wave-functions and energies of the 12 states corresponding to the  $4f^1$  and  $5d^1$  manifolds were obtained from state-averaged CASSCF (complete active space self-consistent field), with inclusion of dynamical electron correlation by MS-CASPT2 together with the ionization potential electron affinity (IPEA) corrected zeroth-order Hamiltonian.<sup>17</sup> The active space corresponds to distributing one electron in the seven  $4f$  and five  $5d$  and the  $6s$  cerium orbital. In the MP2 and MS-CASPT2 calculations, the  $1s$  core orbitals of the oxygen atoms, and core orbitals of the cerium ion were kept frozen. Spin-orbit coupling was treated by state interactions between the MS-CASPT2 wave functions, using the RASSI (restricted active space state interaction) program.<sup>18</sup> The SO operator matrix was calculated from atomic mean-field (AMFI) SO integrals.<sup>19,20</sup> All multi-reference CASPT2 and SO-CASPT2 calculations were run with the MOLCAS8.2 quantum chemistry package.<sup>21</sup> To identify the influence of the second and third coordination shells on the  $Ce^{3+}$   $4f$  and  $5d$  electronic levels. If the effect of these long-range interactions is negligible on the spectra, we can simplify the model to consist of a discrete first coordination sphere along with a polarizable continuum model (PCM) mimicking water as a dielectric medium of permittivity of 78.39.<sup>22,23</sup> To find out, a set of four different calculations were carried out at the spin-free CASSCF level; the results are listed in Table S17. In the simplest model  $4f$ - $4f$  and  $4f$ - $5d$  transition energies were calculated for  $[Ce(H_2O)_9]^{3+}$  in the gas phase. Extending this model with a PCM resulted in a small shift of  $\sim 30\text{ cm}^{-1}$  for the  $4f$ - $4f$  transitions and a slightly larger shift of  $\sim 100\text{ cm}^{-1}$  for the  $4f$ - $5d$  transitions. Interestingly, the addition of an explicit second hydration shell comprising 18 water molecules does not significantly change the  $4f$  and  $5d$  energy levels. Thus, a model consisting of a discrete first coordination shell combined with a PCM is sufficient for our purpose. This model reproduces rather well the  $Ce^{3+}$   $4f$ - $5d$  optical spectra in the different host structures and in aqueous solution.

*1.6.3. QTAIM analysis.* To analyze the nature of the cerium-water/cerium-chloride chemical bond the quantum theory of atoms-in-molecules (QTAIM) analysis, we used the Gaussian 09 (Revision C01) quantum chemistry package,<sup>24</sup> with the same basis sets as to the Turbomole PBE0, which provides the appropriate wave-function extended files (wfx) to be used by the AIMAll package.<sup>25</sup> Note that the PBE0 functional was used to compute the density of the considered complexes.

## 2. Supporting Information for the Results and Discussion Section

### 2.1. Absorption Spectra

*2.1.1. Absorption Spectra of 2 and 4 at 295 and 4 K.* Figure S2 compares the room temperature and low temperature (4.2.K) spectra of  $\text{Ce}^{3+}$  in  $[\text{La}(\text{H}_2\text{O})_9](\text{CF}_3\text{SO}_3)_3$  (**2**) and  $\text{Y}(\text{H}_2\text{O})_8\text{Cl}_3 \cdot 15\text{-crown-5}$  (**4**).

*2.1.2. Absorption vs. Excitation Spectra.* Figure S3 (left) compares the absorption and fluorescence excitation ( $\lambda_{\text{em}} = 332 \text{ nm}$ ) spectra of the 4f-5d transitions of  $[\text{Ce}_x\text{La}_{1-x}(\text{H}_2\text{O})_9](\text{CF}_3\text{SO}_3)_3$  (**2**) for  $x = 0.001$  at room temperature. The positions and the widths of the five 5d bands are very similar in the two spectra, but the band intensity is reduced with increasing energy in the excitation spectrum. This is likely due to very short lifetimes of the higher energy states, affecting the energy transfer from these higher states to the lowest 5d<sup>1</sup> energy level, which is the luminescent state. (Right) The effect of  $\text{Ce}^{3+}$  concentration on the fluorescence excitation spectra of **2** for  $x = 0.001, 0.01, 0.10, 0.50$ , and  $1.0$  at room temperature. As the concentration ratio increases the band widths of the five 5d states increases and band positions shift to longer wavelengths.

*2.1.3. Thermodynamics of the Hydration Equilibrium.* 4f<sup>1</sup>  $\rightarrow$  5d<sup>1</sup> absorption spectra of a  $\text{Ce}^{3+}$  aqueous solution (1.80 mM  $\text{CeCl}_3$  in 20 mM HCl) were measured at temperatures between 10-90 °C in order to derive thermodynamic quantities for eq. 1. The spectra are shown in Figure 3a in the paper.

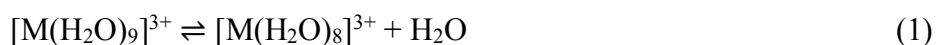

The spectral changes with increasing temperature are rather small; however, they are most likely due to a change in the equilibrium between  $[\text{Ce}(\text{H}_2\text{O})_9]^{3+}$  and  $[\text{Ce}(\text{H}_2\text{O})_8]^{3+}$  species as of eq 1. The spectra are consistent with that the  $[\text{Ce}(\text{H}_2\text{O})_9]^{3+}$  ion is the main species also at 90 °C. The small but significant increase of the 295 nm band indicates that the concentration of  $[\text{Ce}(\text{H}_2\text{O})_8]^{3+}$  increases with temperature while that of  $[\text{Ce}(\text{H}_2\text{O})_9]^{3+}$  decreases (see Figure 3b in the main paper). It is not possible to obtain the spectra of individual species, hindering quantitative analysis of solution as a function of temperature. To elucidate this problem the spectra of the  $\text{Ce}^{3+}$ -doped crystals of **2** and **4** were used for deriving the molar fraction of the  $[\text{Ce}(\text{H}_2\text{O})_9]^{3+}$  and  $[\text{Ce}(\text{H}_2\text{O})_8]^{3+}$  species in solution. Neither could we determine the absolute intensities of the f-d transitions from the spectra of **2** and **4** since they were not of sufficiently high spectroscopic quality. Nevertheless, the relative intensities of the individual components of the f-d transitions derived from their absorption spectra enabled us to obtain the molar fractions of the octa- and nonahydrated  $\text{Ce}^{3+}$  species in solution. It is clearly seen in the spectra of the solutions that only the band centered at 296.6 nm may be attributed to the  $[\text{Ce}(\text{H}_2\text{O})_8]^{3+}$  species (see Figure S4 below and Figure 3a in the main paper). Consequently, only the changes of molar absorptivity coefficient of this band (hereinafter referred to as  $\epsilon_{296.6}$ ) may indicate the changes in the molar fraction of the  $[\text{Ce}(\text{H}_2\text{O})_8]^{3+}$  species. The band centered at 254.5 nm is ascribed mainly to the  $[\text{Ce}(\text{H}_2\text{O})_9]^{3+}$  species; however, this band is a superposition of 4f-5d transitions of both  $[\text{Ce}(\text{H}_2\text{O})_9]^{3+}$  and  $[\text{Ce}(\text{H}_2\text{O})_8]^{3+}$  species. Based on the spectrum of **4** we may assume that for the aqueous  $[\text{Ce}(\text{H}_2\text{O})_8]^{3+}$  species the relative ratio of  $\frac{\epsilon_{296.6}^8}{\epsilon_{254.4}^8} = 1$  for the bands centered at 296.6 and 254.5 nm, respectively. The determined  $\Delta\epsilon$  value at room temperature enabled us to conclude that the  $\frac{\Delta\epsilon_{254.5}^S}{\Delta\epsilon_{296.6}^S}$  ratio is  $\sim 5.33$ , which may be

an indication that the ratios  $\frac{\Delta \varepsilon_{254.5}^S}{\Delta \varepsilon_{296.6}^S}$  and  $\frac{\varepsilon_{254.5}^9}{\varepsilon_{296.6}^8}$  should be very similar. Combining the equations 2-6 it was possible to calculate the molar fractions of both solution species as follows

$$\chi_8 \cdot \varepsilon_{254.5}^8 + \chi_9 \cdot \varepsilon_{254.5}^9 = \varepsilon_{254.5}^S \quad (2)$$

$$\chi_8 \cdot \varepsilon_{296.6}^8 = \varepsilon_{296.6}^S \quad (3)$$

where  $\chi_8$  and  $\chi_9$  are the mole fractions of the  $[\text{Ce}(\text{H}_2\text{O})_8]^{3+}$  and  $[\text{Ce}(\text{H}_2\text{O})_9]^{3+}$  species, respectively. Taking into account from the spectra of **4** that

$$\frac{\varepsilon_{296.6}^8}{\varepsilon_{254.5}^8} = B = 0.958 \quad (4)$$

where B is the ratio of molar absorptivity coefficients for the respective bands for the  $[\text{Ce}(\text{H}_2\text{O})_8]^{3+}$  species, the molar fraction  $\chi_9$  may be calculated from equations 5 and 6.

$$\chi_9 = \frac{\varepsilon_{254.5}^S \cdot B - \varepsilon_{296.6}^S}{B \cdot \varepsilon_{254.5}^8} = Y_1 \quad (5)$$

$$\chi_9 = 1 - \frac{\varepsilon_{296.6}^S}{\varepsilon_{296.6}^8} = Y_2 \quad (6)$$

Minimizing the sum  $\Sigma(Y_1 - Y_2)^2$  it is possible to calculate  $\varepsilon_{296.6}^9$ ,  $\varepsilon_{296.6}^8$  and  $\varepsilon_{254.4}^8$  for the  $[\text{Ce}(\text{H}_2\text{O})_8]^{3+}$  and  $[\text{Ce}(\text{H}_2\text{O})_9]^{3+}$  species. We obtained  $\frac{\varepsilon_{254.5}^9}{\varepsilon_{296.6}^8} \approx 5.9$ , which is consistent with

$\frac{\Delta \varepsilon_{254.5}^S}{\Delta \varepsilon_{296.6}^S} \approx 5.3$ . These results indicate that the intensity of the f-d transition of the  $[\text{Ce}(\text{H}_2\text{O})_8]^{3+}$  species in solution is about 6 times smaller as compared to the transitions of the aqueous  $[\text{Ce}(\text{H}_2\text{O})_9]^{3+}$  species. The quantum chemical calculations presented below give an independent confirmation that the oscillator strength of the  $[\text{Ce}(\text{H}_2\text{O})_9]^{3+}$  ion is noticeably larger than that of the  $[\text{Ce}(\text{H}_2\text{O})_8]^{3+}$  ion due to differences in the transition probabilities (cf. Tables S8 and S10), which are extremely sensitive to the local symmetry. Interestingly, at room temperature the concentration of the aqueous  $[\text{Ce}(\text{H}_2\text{O})_8]^{3+}$  ion is about sixteen percent relative to the aqueous  $[\text{Ce}(\text{H}_2\text{O})_9]^{3+}$  species in solution. Using the determined molar fractions of both isomers the equilibrium constant  $K(T)$  of eq 1 could be calculated. By plotting  $-\ln K$  versus  $T^{-1}$  (see Figure 3c in the main paper) and by applying the Van't Hoff equation

$$-\ln K = \Delta G^\circ / RT = \Delta H^\circ / RT - \Delta S^\circ / R \quad (7)$$

we obtained values for the enthalpy and entropy of the equilibrium reaction eq 1 in agreement with the values published earlier for  $\text{Ce}^{3+}$  and more recently for  $\text{Cm}^{3+}$  (see Table 1 in the main paper).<sup>26,27</sup>

**2.1.4. Experimental Stokes Shift.** Figure S5 compares the 4f-5d absorption and luminescence spectra of **2-5** and the aqueous  $\text{Ce}^{3+}$  solution at room temperature. Each absorption spectra is composed of five bands due to the transitions from the electronic 4f<sup>1</sup> ground state to the five electronic levels of the excited 5d<sup>1</sup> state, while the luminescence spectra are due to electronic transitions from the lowest 5d<sup>1</sup> state to the lower lying <sup>2</sup>F<sub>5/2</sub> and <sup>2</sup>F<sub>7/2</sub> multiplets. This results in two broad contributions. These are fitted with Gaussian bands to account for the broadening caused by the electronic and vibronic transitions to the <sup>2</sup>F<sub>5/2</sub> and <sup>2</sup>F<sub>7/2</sub> crystal field levels. The splitting of the <sup>2</sup>F term into two <sup>2</sup>F<sub>5/2</sub> and <sup>2</sup>F<sub>7/2</sub> multiplets is due to spin-orbit interactions. The Stokes shift is defined as the difference in wavelength between the positions of the band maxima of absorption and emission spectra of the same electronic transition. In

all the measured absorption and emission spectra in present cerium(III) systems, the pure electronic transitions (zero-phonon lines) are not resolved from the vibronic transitions. If the zero-phonon lines coincide in absorption and emission spectra, this means that the structure of cerium(III) complex is not changed. Such is the situation for 4f-4f and 5f-5f transitions, which are well-shielded by the outer 5d and 6d orbitals, respectively. However, this is not the case for the  $\text{Ce}^{3+}$  4f<sup>1</sup>-5d<sup>1</sup> transitions, which are subject of significant changes in the  $\text{Ce}^{3+}$  position as the photo-electron is excited into a 5d<sup>1</sup> orbital with antibonding character. An extreme case the  $\text{Ce}^{3+}$  aqua ion, where photo-excitation results in a release of a water molecule,  $[\text{*Ce}(\text{H}_2\text{O})_9]^{3+} \rightarrow [\text{*Ce}(\text{H}_2\text{O})_8]^{3+} + \text{H}_2\text{O}$ , a process associated with a large change of the geometry of the  $[\text{*Ce}(\text{H}_2\text{O})_9]^{3+}$  complex in excited state and thus a large Stokes shift.

**2.1.5. Luminescence Spectra and Lifetimes.** The room temperature luminescence spectra of **2-5** and the aqueous  $\text{Ce}^{3+}$  solution are shown in Figure S6. Also shown in the figure is the low temperature (~4 K) spectrum of **2**. The room temperature spectra are curve-fitted with two Gaussian component bands to account for the electronic and vibronic contributions of the 5d-4f ( $^2\text{F}_{5/2}$ ,  $^2\text{F}_{7/2}$ ) transitions. The parity-allowed 5d<sup>1</sup>-4f<sup>1</sup> transition is associated with a relatively short luminescence lifetime in the nanosecond range. Because of the antibonding character of the 5d orbitals, a fast rearrangement takes place in the excited state. The rate constant for this process is much higher than the luminescence decay rate constant. This means that luminescence will mainly take place from the structurally “relaxed” species in the excited state,  $[\text{*Ce}(\text{H}_2\text{O})_8]^{3+}$ . This can be depicted as follows: A  $[\text{*Ce}(\text{H}_2\text{O})_9]^{3+}$  species is excited to its 5d<sup>1</sup> state. The structural instability of the excited state gives rise to a fast rearrangement to a  $[\text{*Ce}(\text{H}_2\text{O})_8]^{3+}$  species. Most of the luminescence takes place from  $[\text{*Ce}(\text{H}_2\text{O})_8]^{3+}$ . Therefore, the derived luminescence lifetimes given in Table S5 are associated with  $[\text{*Ce}(\text{H}_2\text{O})_8]^{3+}$ . As can be seen in Figure S7, the luminescence decays are all monoexponential.

**2.1.6. Theoretical Structures.** In order to gain confidence as to how sensitive the 4f<sup>1</sup>-5d<sup>1</sup> spectra are to the actual structure model, several different models were taken into consideration. Thus, we computed the 4f<sup>1</sup>-5d<sup>1</sup> absorption spectra of  $[\text{Ce}(\text{H}_2\text{O})_8]^{3+}$  in distorted bicapped trigonal prismatic (BTP) coordination geometries as well as in square antiprismatic geometries (SAP). In one of the BTP structures the Ce-O bond distances are 1.05 times longer than the Y-O distances in the crystal structure of **4**, compensating for the difference in ionic radii (in eight-coordination) between  $\text{Y}^{3+}$  (1.019 Å) and  $\text{Ce}^{3+}$  (1.143 Å). The mean Ce-O bond distance of this structure is 2.49 Å, which is a typical mean Ce-O bond distance for an eight-coordinated  $\text{Ce}^{3+}$  ion (cf. the Ce-O mean distance in **6**). In a second structure model with BTP geometry, the Ce-O bond distances equal the Y-O distances in **4**. Such large compression of the Ce-O distance due to the chemical pressure exerted on cerium in **4** is not realistic, however this structure model serves as a limiting case and is used to learn about how the spectrum change by changing the Ce-O distances. A similar study was performed with  $[\text{Ce}(\text{H}_2\text{O})_8]^{3+}$  ions in SAP geometries. Because of the similar ionic radii of  $\text{Ce}^{3+}$  and  $\text{La}^{3+}$ , the local structure of cerium in the doped lanthanum compounds are expected to be near to that of lanthanum. The minor differences in the metal-oxygen bond distances should be close to the differences in the ionic radii between the two metal ions. (see Table S1).

**2.1.7. Theoretical Absorption Spectra.** The calculated spectra for all the structures are reported in Tables S7-S11 and are also shown in Figure 6 and Figure S11. In Figure 6 in the main paper only the best calculated (**1a-6a**) spectra are shown together with the corresponding measured spectra. As can be seen in Figure 6 in the main paper the peak positions of the calculated spectra fit very well the peak maxima of the experimental spectra.



This indicates that the local structure of  $\text{Ce}^{3+}$  in the calculated structures is close to that of the real structures. Overall, the total crystal-field splitting of the  $5d^1$  level is larger for shorter Ce-O bond distance. It is also larger for the eight-coordinate BTP geometry (**4-5**) than for the nine-coordinate TTP geometry for the same mean Ce-O distance (**1-3**). Moreover, for the eight-coordinate structures (**4-6**) the intensity of the high-wavelength band is rather pronounced in the experimental spectra but weak in the theoretical spectra, in particular for **6**. These results are compiled in Tables S7-S11 and displayed in Figure 6 and Figure S11. Estimation of the Stokes-shifts is made by calculating the difference between the absorption energy from the lowest  $4f$  state to the first  $5d$  state at the ground-state geometry and the emission energy from the lowest  $5d$  state to the  $4f$ -manifold states at the lowest  $5d$  optimized geometry.

*2.1.8. About Tables S7-S12.* These tables show the *ab initio* computed transition energies and of the  $4f^1$ - $4f^1$  and  $4f^1$ - $5d^1$  electronic transitions as well as oscillator strengths of  $4f^1$ - $5d^1$  electronic transitions for the  $\text{Ce}^{3+}$  in different coordination geometries corresponding to the crystal structures of the compounds **1-6**. The calculations were only including the atoms of the first coordination shell, for example  $[\text{Ce}(\text{H}_2\text{O})_9]^{3+}$  and  $[\text{Ce}(\text{H}_2\text{O})_7\text{Cl}]^{2+}$ . All structures except the neat compound **5** are structures where  $\text{Ce}^{3+}$  ions replace the host metal ions. In these cerium-doped compounds, because the positions of the atoms in the first coordination sphere of cerium is not exactly known, we have assumed that cerium sits at the atomic position of the host metal ion and that the positions of the ligands are those of the host but scaled with a factor corresponding to the difference in the ionic radii between  $\text{Ce}^{3+}$  and the host metal ion. For several structures calculations were performed on expanded and contracted coordination geometries, where the atomic positions had been scaled accordingly from the assumed equilibrium positions. Due to the difference in ionic radii between  $\text{Ce}^{3+}$  and the host metal ion a certain degree of structural-mismatch appears in the vicinity of the cerium ion. Experimentally, it is difficult to determine the exact local structure (bond distances and bond angles) around the cerium dopant ion, although we may assume it is very similar to that of the replaced host metal ion. Thus in the isotypic  $[\text{Ln}(\text{H}_2\text{O})_9](\text{CF}_3\text{SO}_3)_3$  series the mean Ce-O bond distance of  $\text{Ce}^{3+}$  doped in  $[\text{La}(\text{H}_2\text{O})_9](\text{CF}_3\text{SO}_3)_3$  is assumed to be only marginally longer than the mean Ce-O bond distance in  $[\text{Ce}(\text{H}_2\text{O})_9](\text{CF}_3\text{SO}_3)_3$ , but shorter than the mean La-O distance in the host structure.

In general, it is possible to derive fairly accurately the local structure around the dopant cerium ion with DFT calculations using periodic boundary conditions on large super cell structures of the host, in which one of the host metal ion is replaced by  $\text{Ce}^{3+}$ . However, this approach is out of scope for this paper as our aim is primarily to assess how the local structure influences the UV-vis absorption spectra and to some extent also the emission spectra of  $\text{Ce}^{3+}$  in doped compounds and in aqueous solution.

The labelling of the different models is as follows: model **1a-c**, model **2a-b**, model **3a**, model **4a-c**, model **5a**, and model **6a-c**. In the doped compounds the “a” structures correspond to an approximate “equilibrium” structure, in which the Ce-O bond distances are scaled according to the difference in the ionic radii between  $\text{Ce}^{3+}$  and the host metal ion; “b” structures correspond an expanded coordination shell, whereas the “c” structures correspond to a reduced coordination shell.

## 2.2. Figures (S1-S13)

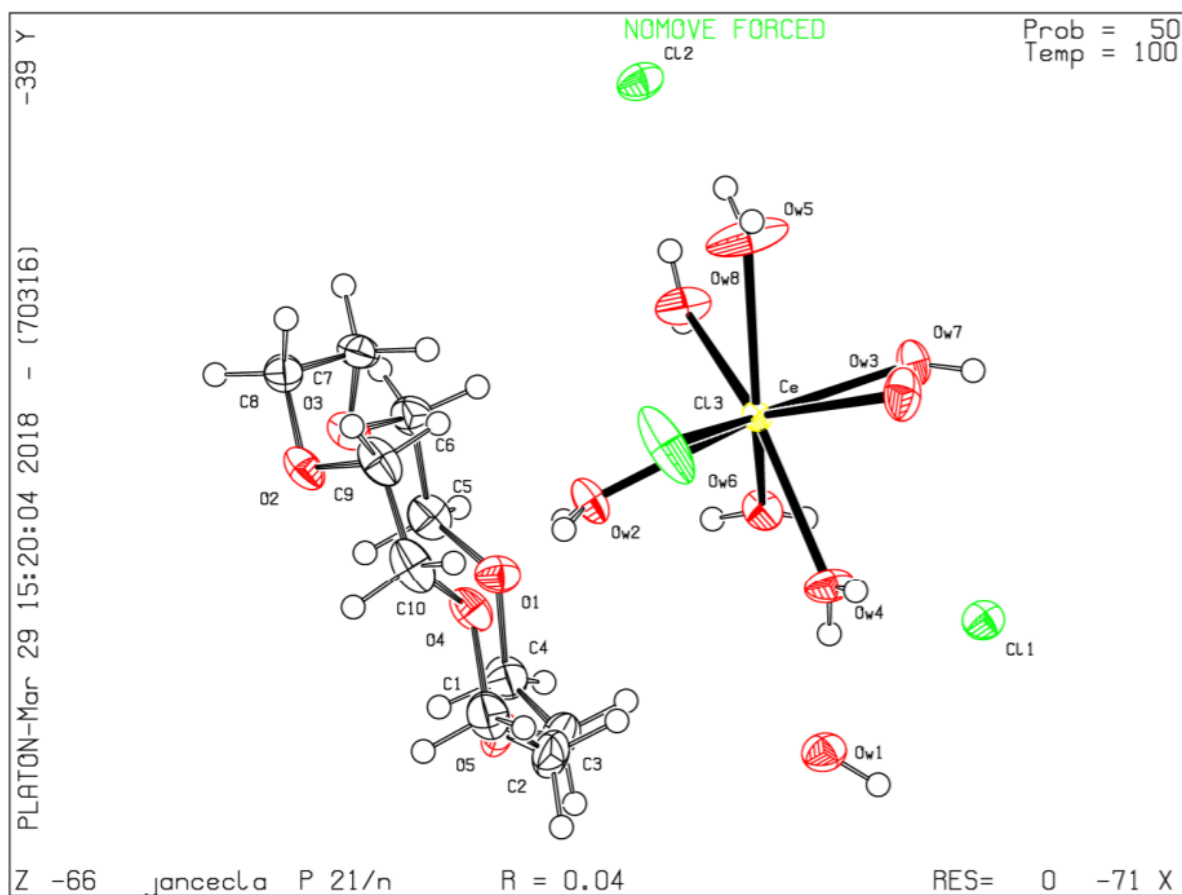

**Figure S1.** X-ray crystal structure of  $[\text{Ce}(\text{H}_2\text{O})_7\text{Cl}]\text{Cl}_2 \cdot 15\text{-crown-5} \cdot \text{H}_2\text{O}$  (**5**) at 100 K. Thermal ellipsoids are drawn at the 50% probability level. The Ce-O and Ce-Cl bond distances (in Å) are Ce-OW4 2.455(2); Ce-OW5 2.472(3); Ce-OW2 2.484(2); Ce-OW7 2.491(2); Ce-OW8 2.494(3); Ce-OW3 2.551(2); Ce-OW6 2.555(2); Ce-Cl3 2.7819(9).

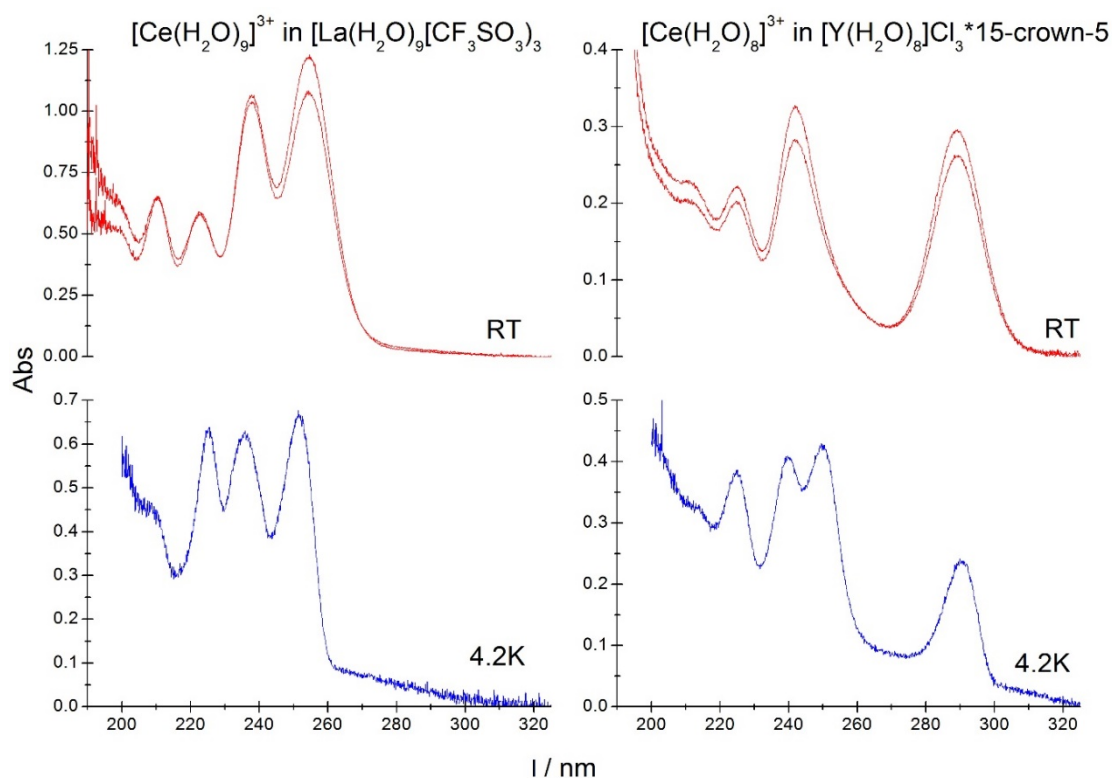

**Figure S2.** Comparison of the room temperature and low temperature (4.2.K) spectra of  $\text{Ce}^{3+}$  in  $[\text{La}(\text{H}_2\text{O})_9](\text{CF}_3\text{SO}_3)_3$  (**2**) and  $\text{Y}(\text{H}_2\text{O})_8\text{Cl}_3 \cdot 15\text{-crown-5}$  (**4**).

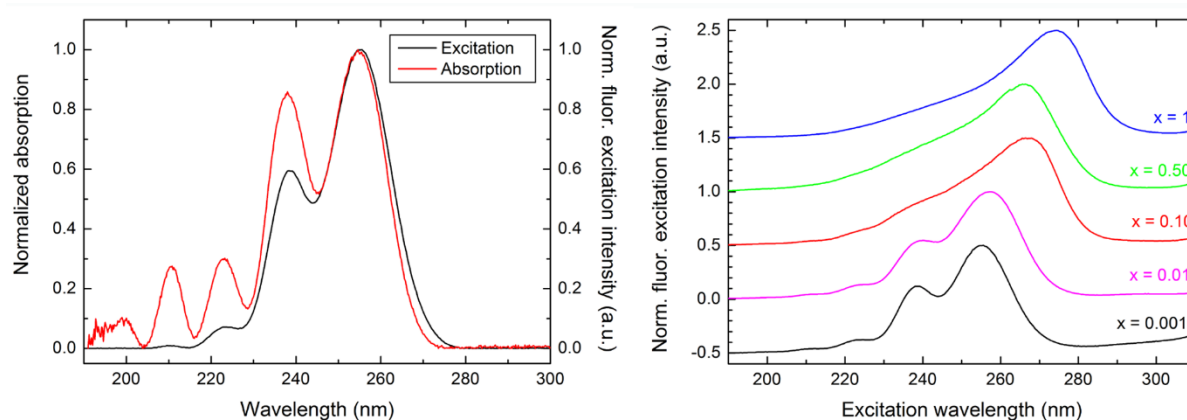

**Figure S3.** (Left) Absorption and fluorescence excitation ( $\lambda_{\text{em}} = 332$  nm) spectra of the  $4f \rightarrow 5d$  transitions of  $[\text{Ce}_x\text{La}_{1-x}(\text{H}_2\text{O})_9](\text{CF}_3\text{SO}_3)_3$  (**2**) for  $x = 0.001$  at room temperature. The positions and the widths of the five  $5d$  bands are very similar in the two spectra, but the band intensity is reduced with increasing energy in the excitation spectrum. This is likely due to very short lifetimes of the higher energy states, affecting the energy transfer from these higher states to the lowest  $5d^1$  energy level, which is the luminescent state. (Right) The effect of  $\text{Ce}^{3+}$  concentration on the fluorescence excitation spectra of **2** for  $x = 0.001$ ,  $0.01$ ,  $0.10$ ,  $0.50$ , and  $1.0$  at room temperature. As the concentration ratio increases the band widths of the five  $5d$  states increases and band positions shift to longer wavelengths.

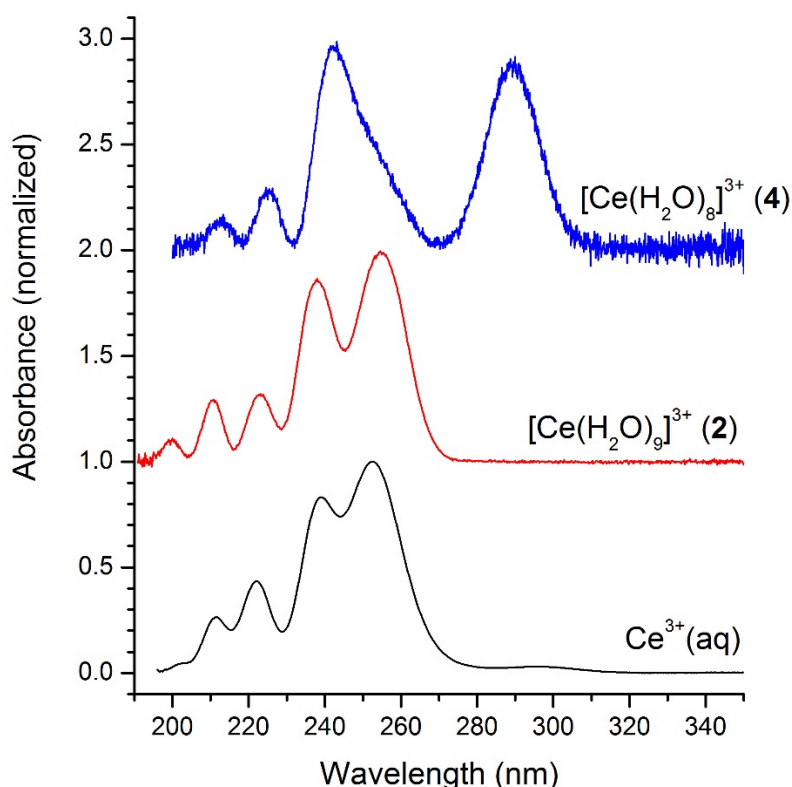

**Figure S4.** Comparison of the  $4f^1 \rightarrow 5d^1$  room temperature absorption spectra of the aqueous cerium(III) solution (1.3 mM  $\text{CeCl}_3$  in 0.01 M HCl) and  $\text{Ce}^{3+}$  in  $[\text{La}(\text{H}_2\text{O})_9](\text{CF}_3\text{SO}_3)_3$  (**2**) and  $[\text{Y}(\text{H}_2\text{O})_8]\text{Cl}_3 \cdot 15\text{-crown-5}$  (**4**). The band maxima in the spectrum of **4** are bathochromically shifted in comparison with those recorded in the spectrum of **2**. This may indicate that the coordination number, i.e., the coordination geometry, is the main factor affecting the position of energy levels of  $5d^1$  and  $4f^1$  configurations. This nephelauxetic effect may indicate a weak covalent contribution to the Ce-O bond, which largely is ionic in nature. Thus, the bicapped trigonal prismatic geometry of the  $[\text{Ce}(\text{H}_2\text{O})_8]^{3+}$  cation in **4** with slightly shorter mean Ce-O bond distance compared to the regular tricapped trigonal prism geometry of the  $[\text{Ce}(\text{H}_2\text{O})_9]^{3+}$  cation in **2**, give rise to the redshifted bands seen in the spectrum of **4**. Observing such a redshift in aqueous solution may indicate a change in the coordination number.

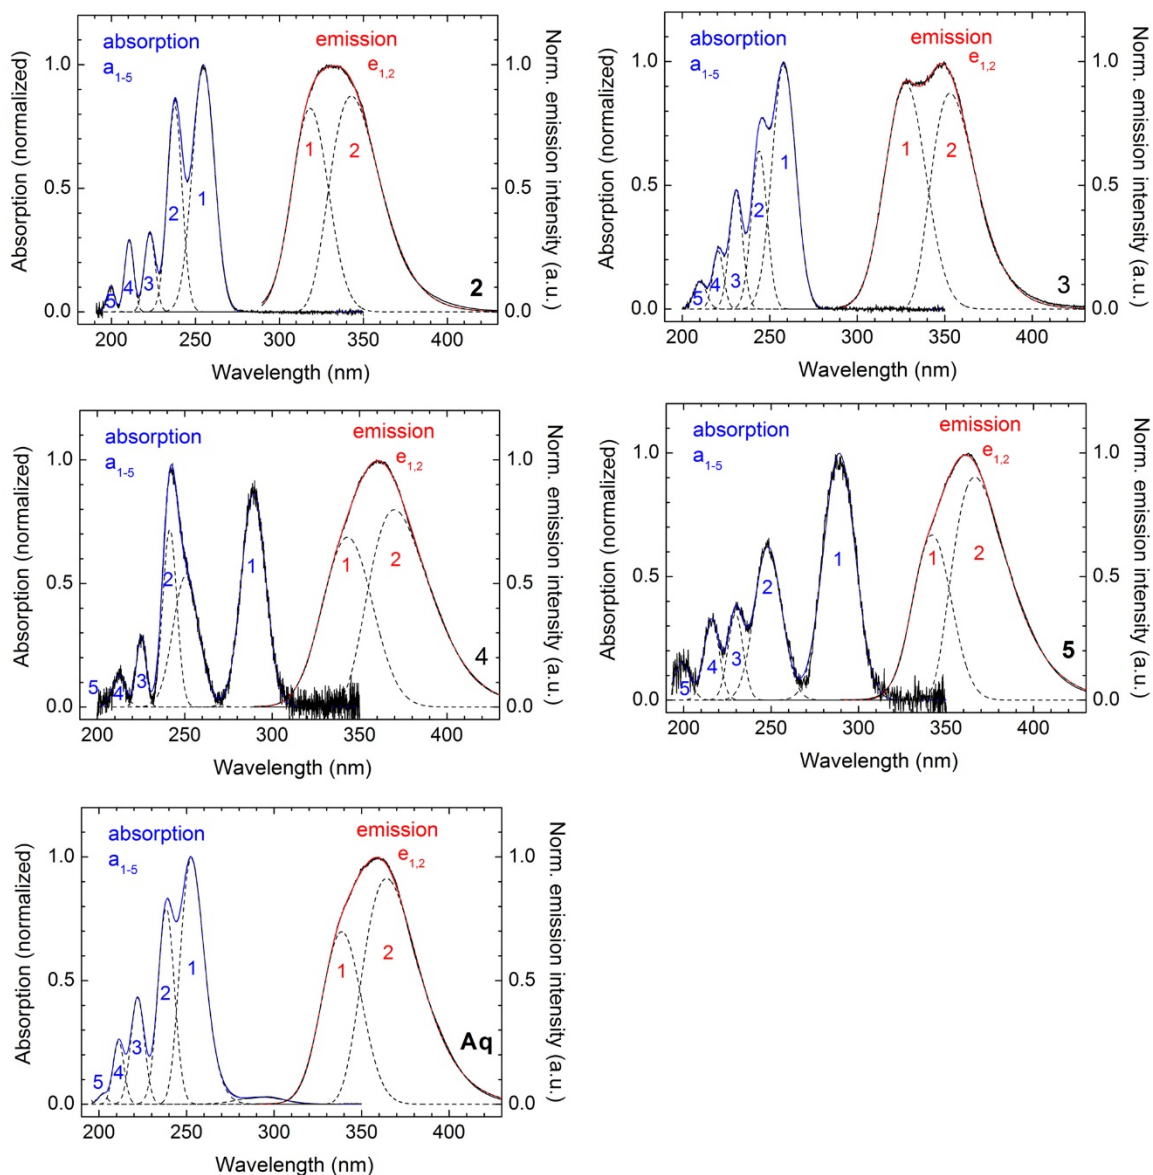

**Figure S5.** Comparison of the 4f-5d absorption and luminescence spectra of **2-5** and the aqueous  $\text{Ce}^{3+}$  solution at room temperature. Each absorption spectra is composed of five bands due to the transitions from the electronic  $4f^1$  ground state to the five electronic levels of the excited  $5d^1$  state, while the luminescence spectra are due to electronic transitions from the lowest  $5d^1$  state to the lower lying  $^2F_{5/2}$  and  $^2F_{7/2}$  multiplets. This results in two broad contributions. These are fitted with Gaussian bands to account the temperature and vibronic line broadening of 4f-5d states. The splitting of the  $^2F$  level is due to spin-orbit interactions.

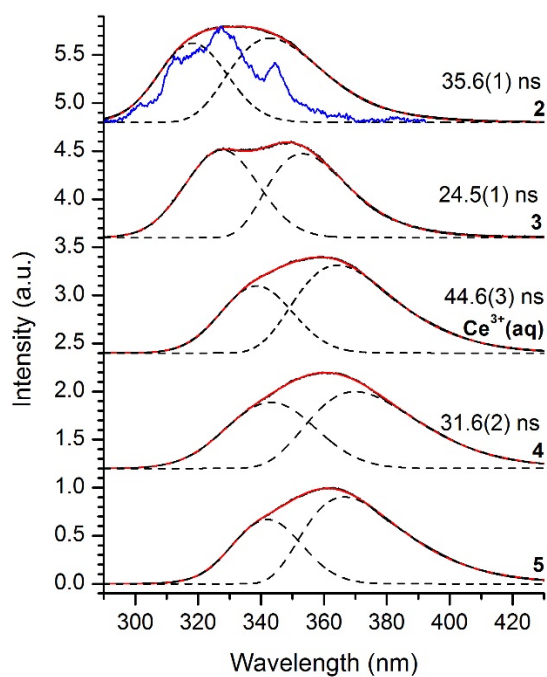

**Figure S6.**  $5d^1 \rightarrow 4f^1$  luminescence spectra of  $\text{Ce}^{3+}$  in **2-5** and in aqueous solution ( $10^{-5}$  M  $\text{Ce}^{3+}$  in 0.01 M  $\text{HClO}_4$ ) at room temperature. The spectra are fitted with two Gaussian bands, which account for the electronic and vibronic transitions to the  $^2F_{5/2}$  and  $^2F_{7/2}$  crystal field states, which are split due to the spin-orbit interaction. A luminescence spectrum of **2** at 4 K is also shown (blue line). Note that even at low temperature the (seven) zero phonon lines are not resolved due to vibronic broadening.

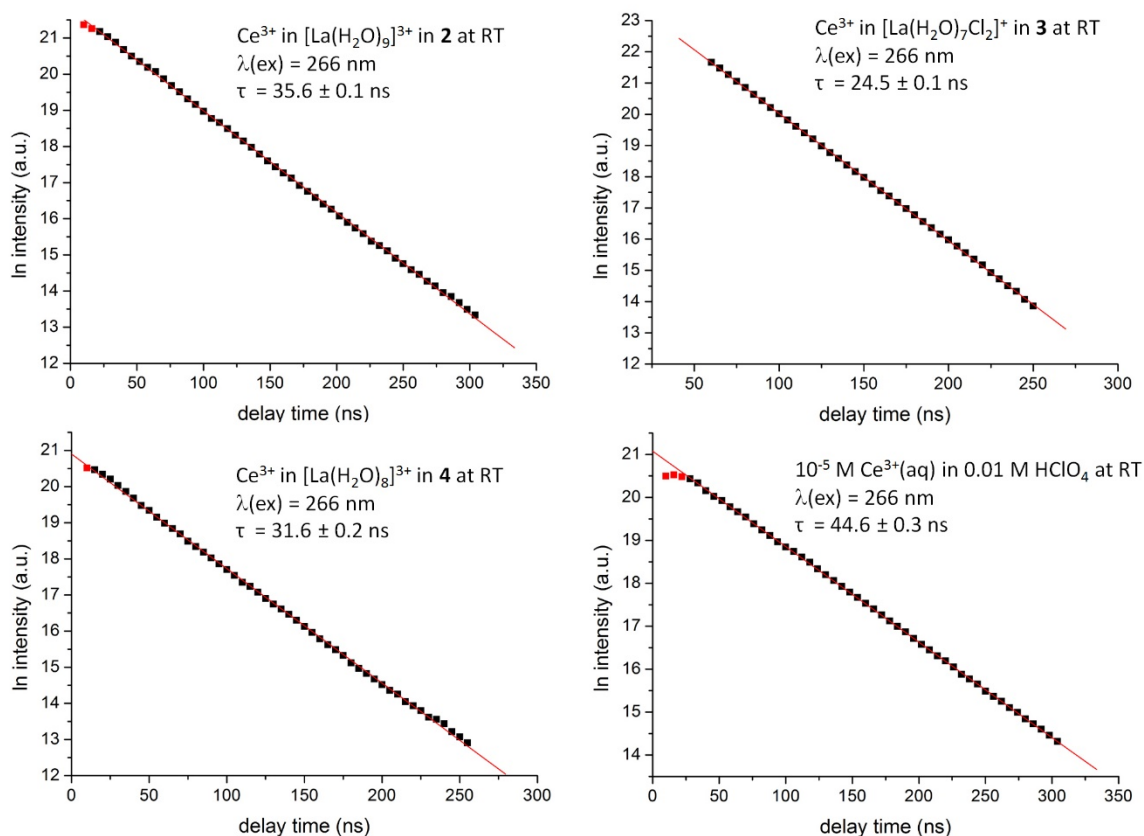

**Figure S7.**  $5d^1 \rightarrow 4f^1$  luminescence decays (■) plotted on the logarithmic scale versus delay the time of  $\text{Ce}^{3+}$  in **2-5** and in aqueous solution ( $10^{-5} \text{ M Ce}^{3+}$  in  $0.01 \text{ M HClO}_4$ ) at room temperature. All the decays are monoexponential, which are fitted with straight line (red).

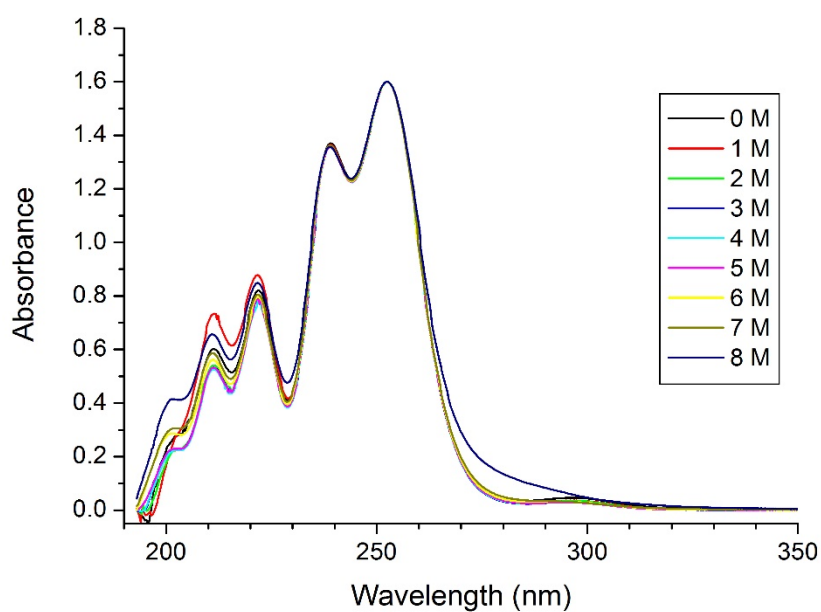

**Figure S8.** 4f-5d absorption spectra of 1.3 mM  $\text{Ce}(\text{ClO}_4)_3$  in 0-8 M  $\text{NaClO}_4$ .

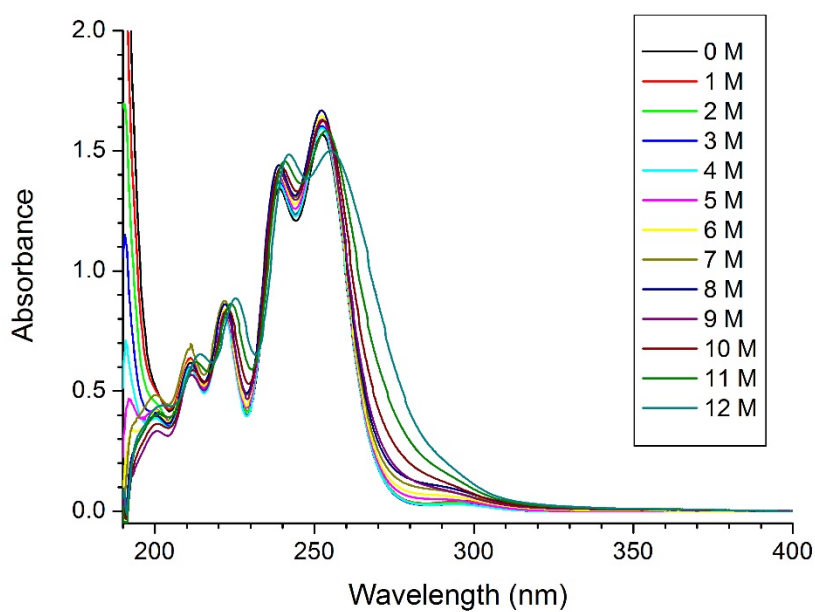

**Figure S9.** 4f-5d absorption spectra of 1.3 mM  $\text{Ce}(\text{ClO}_4)_3$  in 0-12 M  $\text{HClO}_4$ .



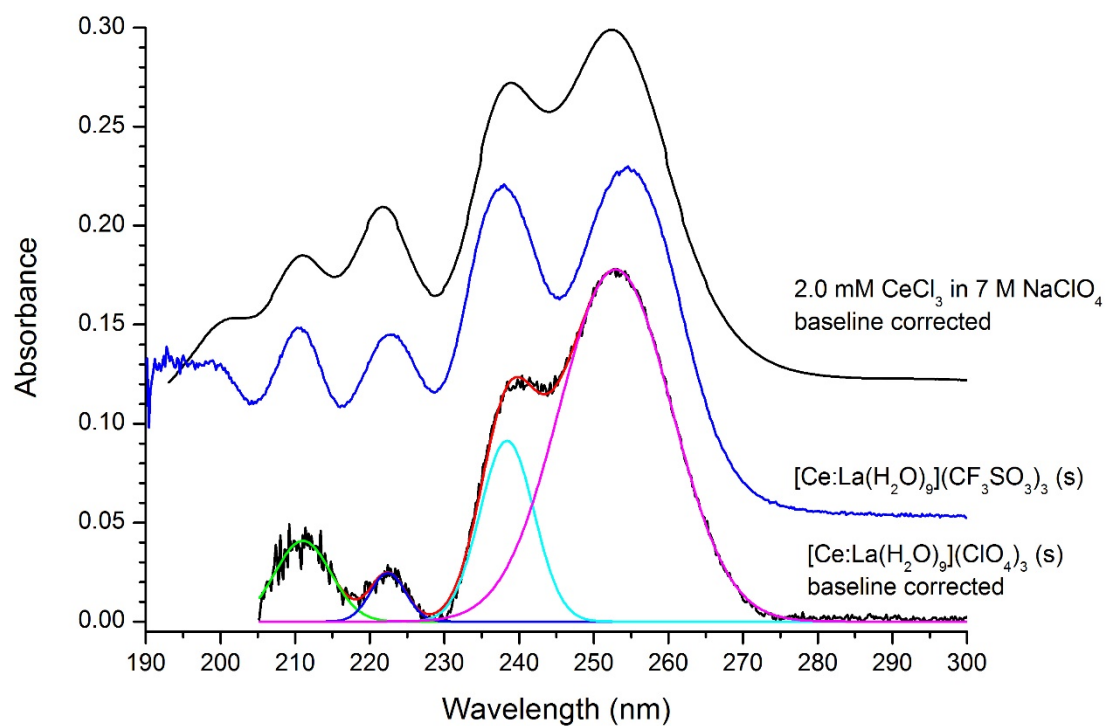

**Figure S10.** Comparison of 4f-5d absorption spectra of 1.3 mM  $\text{Ce}(\text{ClO}_4)_3$  in 7 M  $\text{NaClO}_4$ , crystalline  $[\text{Ce}:\text{La}(\text{H}_2\text{O})_9](\text{CF}_3\text{SO}_3)_3$  and crystalline  $[\text{Ce}:\text{La}(\text{H}_2\text{O})_9](\text{ClO}_4)_3$  at room temperature.

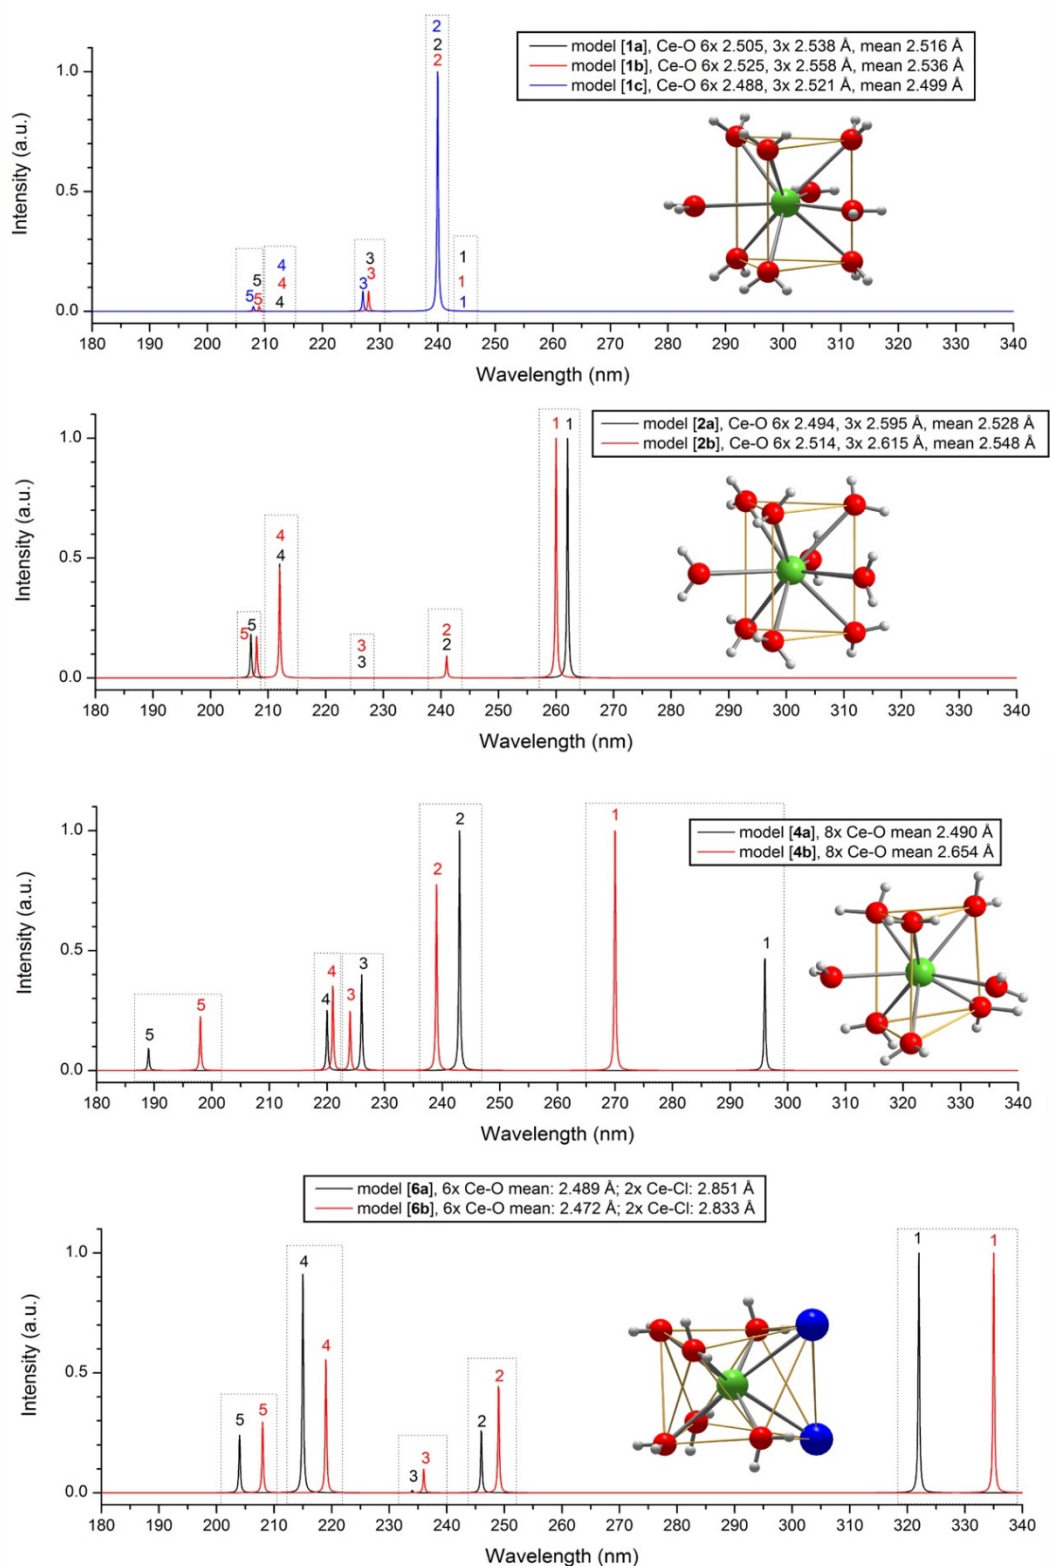

**Figure S11.** Computed absorption spectra for various coordination model around  $\text{Ce}^{3+}$  ion at the SO-CASPT2 level. Models are defined in Tables S7-S11.

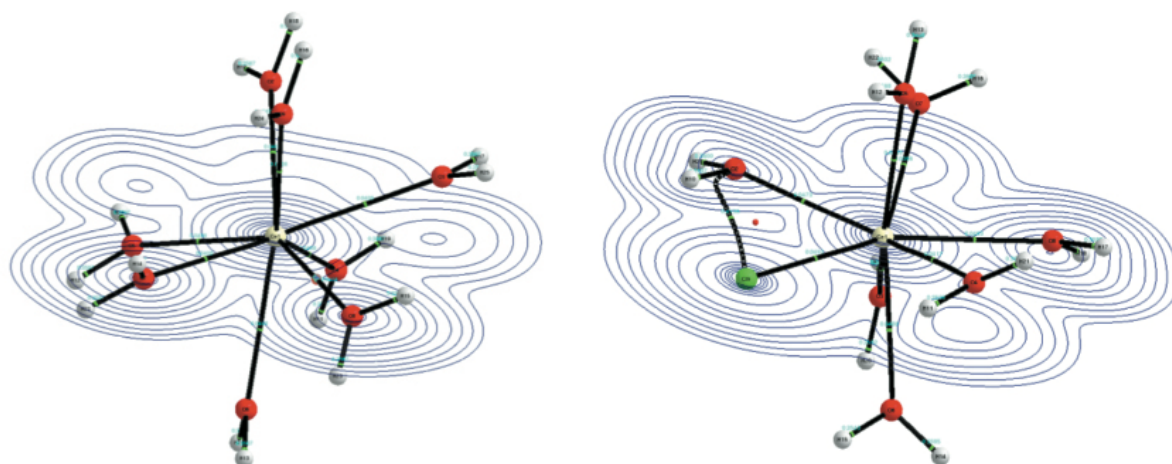

**Figure S12.** Electron densities of  $[\text{Ce}(\text{H}_2\text{O})_8]^{3+}$  and  $[\text{Ce}(\text{H}_2\text{O})_7\text{Cl}]^{2+}$ . Contour maps of the electronic densities are shown as thin blue lines; the BCPs are shown as small green spheres.

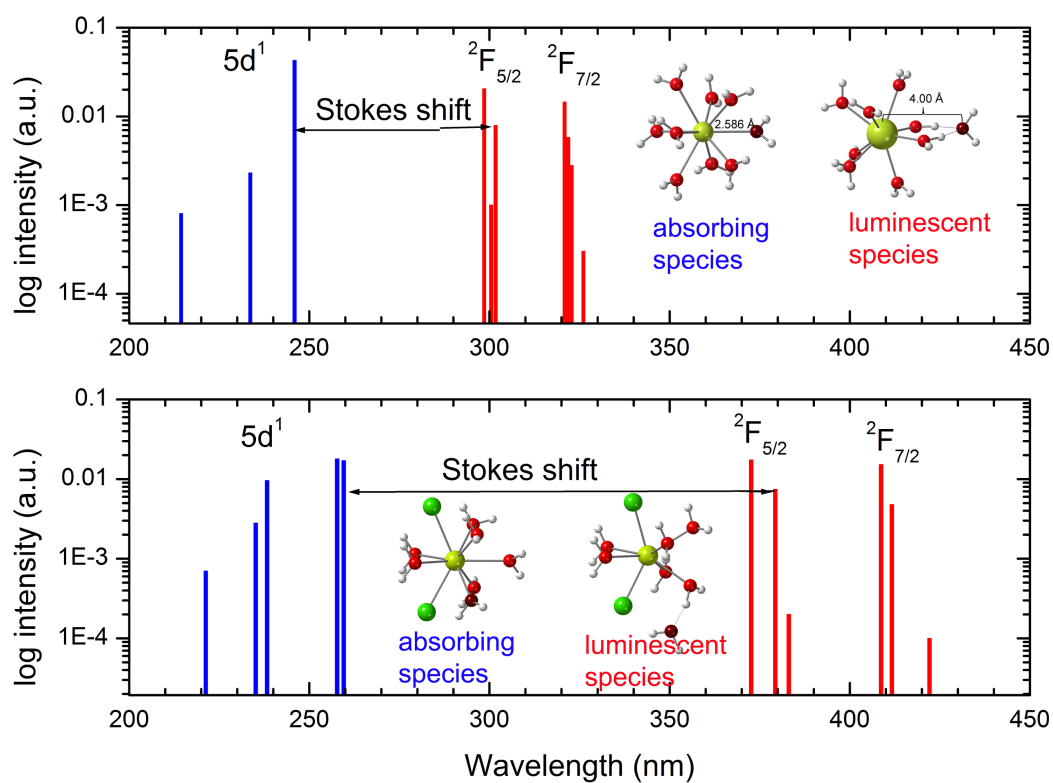

**Figure S13.** Computed absorption spectra of the  $[\text{Ce}(\text{H}_2\text{O})_9]^{3+}$  and the  $[\text{Ce}(\text{H}_2\text{O})_7\text{Cl}_2]^+$  species and the corresponding emission spectra of  $[\text{*Ce}(\text{H}_2\text{O})_8]^{3+} \cdot \text{H}_2\text{O}$  and  $[\text{*Ce}(\text{H}_2\text{O})_6\text{Cl}_2] \cdot \text{H}_2\text{O}$ . The data are taken from Tables S15 and S16.

### 2.3. Tables (S1-S18)

**Table S1:** Coordination Geometry Data with Metal-Oxygen/Chloride Bond Distances [and Mean Distances] of the Ce-Doped Compounds (**1-4**, **6**) and the Neat Compound (**5**) and Estimated Ce-O and Ce-Cl Bond Distances for the Ce-Doped Compounds

| host; coordination geometry (symm.) of metal ion                                                                              | metal-oxygen and metal-chloride bond distances (Å)                       |
|-------------------------------------------------------------------------------------------------------------------------------|--------------------------------------------------------------------------|
| <b>1</b> [La(H <sub>2</sub> O) <sub>9</sub> ](BrO <sub>3</sub> ) <sub>3</sub> ; TTP ( <i>D</i> <sub>3h</sub> )                | La-O 6×2.525, 3×2.558 [2.536] <sup>a</sup> ; Ce-O 6×2.51, 3×2.54 [2.525] |
| <b>2</b> [La(H <sub>2</sub> O) <sub>9</sub> ](CF <sub>3</sub> SO <sub>3</sub> ) <sub>3</sub> ; TTP ( <i>C</i> <sub>3h</sub> ) | La-O 6×2.514, 3×2.615; [2.548]; Ce-O 6×2.49, 3×2.59 [2.54]               |
| <b>3</b> [La(H <sub>2</sub> O) <sub>7</sub> (μ-Cl)] <sub>2</sub> Cl <sub>4</sub> ; TTP ( <i>C</i> <sub>1</sub> )              | La-O 2.529-2.586 [2.562]; La-Cl 2.924, 2.958 [2.941]; Cl-Cl 2.93 [2.91]  |
| <b>4</b> [Y(H <sub>2</sub> O) <sub>8</sub> ]Cl <sub>3</sub> ·15-crown-5; BTP (~ <i>C</i> <sub>2</sub> )                       | Y-O 2.317-2.432 [2.366]; Ce-O 2.44-2.56 [2.49] <sup>d</sup>              |
| <b>5</b> [Ce(H <sub>2</sub> O) <sub>7</sub> Cl]Cl <sub>2</sub> ·15-crown-5·H <sub>2</sub> O; BTP (~ <i>C</i> <sub>2</sub> )   | Ce-O 2.455-2.556 [2.499]; Ce-Cl 2.782                                    |
| <b>6</b> [Y(H <sub>2</sub> O) <sub>6</sub> Cl <sub>2</sub> ]Cl; SAP (~ <i>C</i> <sub>2</sub> )                                | Y-O 2.334-2.361; [2.352]; Y-Cl 2×2.740; Ce-O 2.47-2.56 [2.515]           |

<sup>a</sup> The La-O and Ce-O distances of the [La(H<sub>2</sub>O)<sub>9</sub>]<sup>3+</sup> and [Ce(H<sub>2</sub>O)<sub>9</sub>]<sup>3+</sup> ions in **1** are assumed to be slightly longer than the Pr-O distances in [Pr(H<sub>2</sub>O)<sub>9</sub>](BrO<sub>3</sub>)<sub>3</sub>, 6×2.488 and 3×2.521 Å. Using the difference in ionic radii in nine-coordination between La<sup>3+</sup> (1.216 Å) and Pr<sup>3+</sup> (1.179 Å) and between Ce<sup>3+</sup> (1.196 Å) and Pr<sup>3+</sup> (1.179 Å) we estimate the La-O and Ce-O distances in **1** to be about 0.037 and 0.017 Å longer, respectively, than the reported distances in [Pr(H<sub>2</sub>O)<sub>9</sub>](BrO<sub>3</sub>)<sub>3</sub>. <sup>b</sup> The Ce-O distance of the [Ce(H<sub>2</sub>O)<sub>9</sub>]<sup>3+</sup> ions in **2** are assumed to be very close to the distances in [Ce(H<sub>2</sub>O)<sub>9</sub>](CF<sub>3</sub>SO<sub>3</sub>)<sub>3</sub>. <sup>c</sup> The Ce-O and Ce-Cl distance of the [Ce(H<sub>2</sub>O)<sub>7</sub>Cl]<sub>2</sub><sup>+</sup> ions in **3** are assumed to be close to the distances in [Ce(H<sub>2</sub>O)<sub>7</sub>(μ-Cl)]<sub>2</sub>Cl<sub>4</sub>. <sup>d</sup> The Ce-O distance of the [Ce(H<sub>2</sub>O)<sub>8</sub>]<sup>3+</sup> ions in **4** are assumed to be slightly longer than the Sm-O distances in [Sm(H<sub>2</sub>O)<sub>8</sub>]Cl<sub>3</sub>·15-crown-5 (my own data). Using the ionic radii difference between Ce<sup>3+</sup> and Sm<sup>3+</sup> in eight-coordination, 1.143 and 1.079 Å, respectively, we estimate the Ce-O distance in **4** to be ca. 0.064 Å longer than those reported [Sm(H<sub>2</sub>O)<sub>8</sub>]Cl<sub>3</sub>·15-crown-5 Å. The same results is obtained if we chose to compare with [Y(H<sub>2</sub>O)<sub>8</sub>]Cl<sub>3</sub>·15-crown-5 (**4**) by adding 0.124 Å to the Y-O bond distances. <sup>e</sup> The Ce-O and Ce-Cl distance of the [Ce(H<sub>2</sub>O)<sub>6</sub>Cl<sub>2</sub>]<sup>+</sup> ions in **6** are assumed to be close to the distances in [Ce(H<sub>2</sub>O)<sub>6</sub>Cl<sub>2</sub>]Cl.

**Table S2.** Crystal Data of **5**.

|                                |                                                         |
|--------------------------------|---------------------------------------------------------|
| $C_{10}H_{32}CeCl_3O_{13}$     | $F(000) = 1220$                                         |
| $M_r = 606.82$                 | $D_x = 1.693 \text{ Mg m}^{-3}$                         |
| Monoclinic, $P2_1/n$           | Mo $K\alpha$ radiation, $\lambda = 0.71073 \text{ \AA}$ |
| $a = 10.831 (2) \text{ \AA}$   | Cell parameters from 12669 reflections                  |
| $b = 16.236 (2) \text{ \AA}$   | $\theta = 2.9\text{--}36.6^\circ$                       |
| $c = 13.544 (2) \text{ \AA}$   | $\mu = 2.30 \text{ mm}^{-1}$                            |
| $\beta = 91.23 (2)^\circ$      | $T = 100 \text{ K}$                                     |
| $V = 2381.2 (6) \text{ \AA}^3$ | Irregular, colorless                                    |
| $Z = 4$                        | $0.19 \times 0.17 \times 0.12 \text{ mm}$               |

**Table S3:** Data Collection of **5**.

|                                                                                                                                                                                                                                                                                                                                                                                         |                                                                        |
|-----------------------------------------------------------------------------------------------------------------------------------------------------------------------------------------------------------------------------------------------------------------------------------------------------------------------------------------------------------------------------------------|------------------------------------------------------------------------|
| Xcalibur, Sapphire2, large Be window diffractometer                                                                                                                                                                                                                                                                                                                                     | 5498 reflections with $I > 2\sigma(I)$                                 |
| Radiation source: Enhance (Mo) X-ray Source                                                                                                                                                                                                                                                                                                                                             | $R_{\text{int}} = 0.046$                                               |
| Detector resolution: $8.3359 \text{ pixels mm}^{-1}$                                                                                                                                                                                                                                                                                                                                    | $\theta_{\text{max}} = 36.7^\circ$ , $\theta_{\text{min}} = 2.9^\circ$ |
| Absorption correction: analytical<br><i>CrysAlis RED</i> , Oxford Diffraction Ltd., Version 1.171.33.66 (release 28-04-2010 CrysAlis171 .NET) (compiled Apr 28 2010, 14:27:37) Analytical numeric absorption correction using a multifaceted crystal model based on expressions derived by R.C. Clark & J.S. Reid. (Clark, R. C. & Reid, J. S. (1995). <i>Acta Cryst.</i> A51, 887-897) | $h = -13 \rightarrow 14$                                               |
| $T_{\text{min}} = 0.649$ , $T_{\text{max}} = 1.000$                                                                                                                                                                                                                                                                                                                                     | $k = -26 \rightarrow 21$                                               |
| 17189 measured reflections                                                                                                                                                                                                                                                                                                                                                              | $l = -13 \rightarrow 18$                                               |
| 6542 independent reflections                                                                                                                                                                                                                                                                                                                                                            |                                                                        |

**Table S4:** Refinement of **5**.

|                                 |                                                                        |
|---------------------------------|------------------------------------------------------------------------|
| Refinement on $F^2$             | 0 restraints                                                           |
| Least-squares matrix: full      | Hydrogen site location: mixed                                          |
| $R[F^2 > 2\sigma(F^2)] = 0.038$ | H atoms treated by a mixture of independent and constrained refinement |
| $wR(F^2) = 0.106$               | $w = 1/[\sigma^2(F_o^2) + (0.0754P)^2]$ where $P = (F_o^2 + 2F_c^2)/3$ |
| $S = 1.03$                      | $(\Delta/\sigma)_{\text{max}} = 0.001$                                 |
| 6542 reflections                | $\Delta\rho_{\text{max}} = 1.27 \text{ e \AA}^{-3}$                    |
| 296 parameters                  | $\Delta\rho_{\text{min}} = -0.78 \text{ e \AA}^{-3}$                   |

**Table S5:** Peak maxima of the deconvoluted  $4f^1$ - $5d^1$  room temperature emission spectra in Figure 6 and the corresponding emission lifetime of  $Ce^{3+}$  in **2**, **3**, **4**, **5**, and in aqueous solution.

| sample                                       | $\lambda_{em}$ band 1 (nm) | $\lambda_{em}$ band 2 (nm) | $\Delta$ (cm <sup>-1</sup> ) | $\tau$ (ns)    |
|----------------------------------------------|----------------------------|----------------------------|------------------------------|----------------|
| <b>2</b>                                     | 318                        | 343                        | 2240                         | $35.6 \pm 0.1$ |
| <b>3</b>                                     | 327                        | 353                        | 2240                         | $24.5 \pm 0.1$ |
| <b>4</b>                                     | 343                        | 369                        | 2050                         | $31.6 \pm 0.2$ |
| <b>5</b>                                     | 342                        | 367                        | 1990                         | -              |
| <b>10<sup>-5</sup> M Ce<sup>3+</sup>(aq)</b> | 339                        | 364                        | 2080                         | $44.6 \pm 0.3$ |

**Table S6:** Lowest absorption band (emitting state), deconvoluted emission band (band 1,  $^2F_{5/2}$ ) and Stokes shift of  $Ce^{3+}$  in **2**, **3**, **4**, **5**, and in aqueous solution (cf. Figure S5).

| sample                                       | $\lambda_{abs}$ band 1 (nm) | $\lambda_{em}$ band 1, $^2F_{5/2}$ (nm) | Stokes shift (cm <sup>-1</sup> ) |
|----------------------------------------------|-----------------------------|-----------------------------------------|----------------------------------|
| <b>2</b>                                     | 255                         | 318                                     | 7770                             |
| <b>3</b>                                     | 258                         | 327                                     | 8180                             |
| <b>4</b>                                     | 289                         | 343                                     | 5450                             |
| <b>5</b>                                     | 289                         | 342                                     | 5390                             |
| <b>10<sup>-5</sup> M Ce<sup>3+</sup>(aq)</b> | 253                         | 339                                     | 10060                            |

**Table S7:** Computed  $Ce^{3+}$   $4f^1$ - $4f^1$  and  $4f^1$ - $5d^1$  Transition Energies ( $E$ ), Transition Wavelengths ( $\lambda$ ), and Oscillator Strengths ( $f$ ) of  $[Ce(H_2O)_9]^{3+}$  with Different Ce-O Bond Distances in Tricapped Trigonal Prismatic Geometry and  $D_{3h}$  Symmetry as in the Crystal Structures of  $[La(H_2O)_9](BrO_3)_3$

|                 | model <b>1a</b><br>equilibrium Ce-O<br>distances<br>6×2.505, 3×2.538 Å<br>(mean: 2.516 Å) |                |            | model <b>1b</b><br>expanded Ce-O distances<br>6×2.525, 3×2.558 Å,<br>(mean 2.536 Å) |                |            | model <b>1c</b><br>reduced Ce-O distances<br>6×2.488, 3×2.521 Å,<br>(mean 2.499 Å) |                |            |
|-----------------|-------------------------------------------------------------------------------------------|----------------|------------|-------------------------------------------------------------------------------------|----------------|------------|------------------------------------------------------------------------------------|----------------|------------|
| transition      | $E$ , cm <sup>-1</sup>                                                                    | $\lambda$ , nm | $f$ , a.u. | $E$ , cm <sup>-1</sup>                                                              | $\lambda$ , nm | $f$ , a.u. | $E$ , cm <sup>-1</sup>                                                             | $\lambda$ , nm | $f$ , a.u. |
| $4f^1$ - $4f^1$ | 0                                                                                         |                |            | 0                                                                                   |                |            | 0                                                                                  |                |            |
|                 | 184                                                                                       |                |            | 147                                                                                 |                |            | 204                                                                                |                |            |
|                 | 224                                                                                       |                |            | 191                                                                                 |                |            | 237                                                                                |                |            |
|                 | 2288                                                                                      |                |            | 2278                                                                                |                |            | 2290                                                                               |                |            |
|                 | 2461                                                                                      |                |            | 2427                                                                                |                |            | 2478                                                                               |                |            |
|                 | 2574                                                                                      |                |            | 2545                                                                                |                |            | 2594                                                                               |                |            |
|                 | 2607                                                                                      |                |            | 2577                                                                                |                |            | 2635                                                                               |                |            |
| $4f^1$ - $5d^1$ | 40614                                                                                     | 246            | 0.0000     | 40680                                                                               | 246            | 0.0000     | 40397                                                                              | 248            | 0.0000     |
|                 | 41699                                                                                     | 240            | 0.0429     | 41746                                                                               | 240            | 0.0428     | 41654                                                                              | 240            | 0.0428     |
|                 | 43895                                                                                     | 228            | 0.0034     | 43950                                                                               | 228            | 0.0036     | 43845                                                                              | 227            | 0.0036     |
|                 | 47049                                                                                     | 213            | 0.0000     | 46896                                                                               | 213            | 0.0000     | 47099                                                                              | 212            | 0.0000     |
|                 | 48006                                                                                     | 209            | 0.0009     | 47850                                                                               | 209            | 0.0009     | 48062                                                                              | 208            | 0.0009     |

**Table S8:** Computed  $\text{Ce}^{3+}$   $4f^1$ - $4f^1$  and  $4f^1$ - $5d^1$  Transition Energies ( $E$ ), Transition Wavelengths ( $\lambda$ ), and Oscillator Strengths ( $f$ ) of  $[\text{Ce}(\text{H}_2\text{O})_9]^{3+}$  with Different Ce-O Bond Distances in Tricapped Trigonal Prismatic Geometry and  $C_{3h}$  Symmetry as in the Crystal Structures of  $[\text{La}(\text{H}_2\text{O})_9](\text{CF}_3\text{SO}_3)_3$

|                 | model <b>2a</b><br>equilibrium Ce-O distances<br>6×2.494, 3×2.595 Å ( mean 2.528 Å) |                |            | M = La, model <b>2b</b><br>expanded Ce-O distances<br>6×2.514, 3×2.615 Å (mean 2.548 Å) |                |            |
|-----------------|-------------------------------------------------------------------------------------|----------------|------------|-----------------------------------------------------------------------------------------|----------------|------------|
| transition      | $E$ , $\text{cm}^{-1}$                                                              | $\lambda$ , nm | $f$ , a.u. | $E$ , $\text{cm}^{-1}$                                                                  | $\lambda$ , nm | $f$ , a.u. |
| $4f^1$ - $4f^1$ | 0                                                                                   |                |            | 0                                                                                       |                |            |
|                 | 67                                                                                  |                |            | 58                                                                                      |                |            |
|                 | 209                                                                                 |                |            | 200                                                                                     |                |            |
|                 | 2281                                                                                |                |            | 2282                                                                                    |                |            |
|                 | 2335                                                                                |                |            | 2329                                                                                    |                |            |
|                 | 2522                                                                                |                |            | 2512                                                                                    |                |            |
|                 | 2534                                                                                |                |            | 2525                                                                                    |                |            |
|                 | 38237                                                                               | 262            | 0.0270     | 38478                                                                                   | 260            | 0.0272     |
| $4f^1$ - $5d^1$ | 41450                                                                               | 241            | 0.0024     | 41482                                                                                   | 241            | 0.0025     |
|                 | 43606                                                                               | 229            | 0.0000     | 43645                                                                                   | 229            | 0.0000     |
|                 | 47269                                                                               | 212            | 0.0126     | 47120                                                                                   | 212            | 0.0123     |
|                 | 48290                                                                               | 207            | 0.0048     | 48134                                                                                   | 208            | 0.0046     |

**Table S9:** Computed  $\text{Ce}^{3+}$   $4f^1$ - $4f^1$  and  $4f^1$ - $5d^1$  Transition Energies ( $E$ ), Transition Wavelengths ( $\lambda$ ), and Oscillator Strengths ( $f$ ) for  $[\text{Ce}(\text{H}_2\text{O})_7\text{Cl}_2]^+$  in  $[\text{Ce}(\text{H}_2\text{O})_7(\mu\text{-Cl})_2]\text{Cl}_4$  and  $[\text{Ce}(\text{H}_2\text{O})_7\text{Cl}]^{2+}$  in  $[\text{Ce}(\text{H}_2\text{O})_7\text{Cl}]\text{Cl}_2 \cdot 15\text{-crown-5} \cdot \text{H}_2\text{O}$

|                 | model <b>3a</b><br>$[\text{Ce}(\text{H}_2\text{O})_7\text{Cl}_2]^+$ , equilibrium distances:<br>Ce-O 2.494-2.554 Å (mean 2.523 Å)<br>Ce-Cl 2.898, 2.926 Å (mean 2.912 Å) |                |            | model <b>5a</b><br>$[\text{Ce}(\text{H}_2\text{O})_7\text{Cl}]^{2+}$ , equilibrium distances:<br>Ce-O 2.455-2.556 Å (mean 2.499 Å)<br>Ce-Cl 2.782 |                |            |
|-----------------|--------------------------------------------------------------------------------------------------------------------------------------------------------------------------|----------------|------------|---------------------------------------------------------------------------------------------------------------------------------------------------|----------------|------------|
| transition      | $E$ , $\text{cm}^{-1}$                                                                                                                                                   | $\lambda$ , nm | $f$ , a.u. | $E$ , $\text{cm}^{-1}$                                                                                                                            | $\lambda$ , nm | $f$ , a.u. |
| $4f^1$ - $4f^1$ | 0                                                                                                                                                                        |                |            | 0                                                                                                                                                 |                |            |
|                 | 66                                                                                                                                                                       |                |            | 167                                                                                                                                               |                |            |
|                 | 289                                                                                                                                                                      |                |            | 393                                                                                                                                               |                |            |
|                 | 2270                                                                                                                                                                     |                |            | 2303                                                                                                                                              |                |            |
|                 | 2342                                                                                                                                                                     |                |            | 2386                                                                                                                                              |                |            |
|                 | 2484                                                                                                                                                                     |                |            | 2524                                                                                                                                              |                |            |
|                 | 2656                                                                                                                                                                     |                |            | 2827                                                                                                                                              |                |            |
|                 | 38601                                                                                                                                                                    | 259            | 0.0170     | 32412                                                                                                                                             | 309            | 0.0189     |
| $4f^1$ - $5d^1$ | 38872                                                                                                                                                                    | 257            | 0.0179     | 39585                                                                                                                                             | 253            | 0.0065     |
|                 | 42053                                                                                                                                                                    | 238            | 0.0096     | 43416                                                                                                                                             | 230            | 0.0044     |
|                 | 42620                                                                                                                                                                    | 235            | 0.0028     | 45244                                                                                                                                             | 221            | 0.0077     |
|                 | 45294                                                                                                                                                                    | 221            | 0.0007     | 49758                                                                                                                                             | 201            | 0.0068     |



**Table S10:** Computed  $\text{Ce}^{3+}$   $4f^1$ - $4f^1$  and  $4f^1$ - $5d^1$  Transition Energies ( $E$ ), Transition Wavelengths ( $\lambda$ ), and Oscillator Strengths ( $f$ ) of  $[\text{Ce}(\text{H}_2\text{O})_8]^{3+}$  with Different Ce-O Bond Distances in Bicapped Trigonal Prismatic Geometry as in  $[\text{Y}(\text{H}_2\text{O})_8]\text{Cl}_3 \cdot 15\text{-crown-5}$

|                 | model <b>4a</b><br>equilibrium Ce-O<br>distances<br>range: 2.440-2.560 Å<br>(mean 2.490 Å)                                     | model <b>4b</b><br>expanded Ce-O distances<br>range: 2.599-2.728 Å<br>(mean 2.654 Å)                                           | model <b>4c</b><br>reduced Ce-O distances<br>range: 2.316- 2.432 Å.<br>(mean: 2.366 Å)                                         |
|-----------------|--------------------------------------------------------------------------------------------------------------------------------|--------------------------------------------------------------------------------------------------------------------------------|--------------------------------------------------------------------------------------------------------------------------------|
| transition      | $E$ , $\text{cm}^{-1}$ $\lambda$ , nm $f$ , a.u.                                                                               | $E$ , $\text{cm}^{-1}$ $\lambda$ , nm $f$ , a.u.                                                                               | $E$ , $\text{cm}^{-1}$ $\lambda$ , nm $f$ , a.u.                                                                               |
| $4f^1$ - $4f^1$ | 0<br>64<br>410<br>2258<br>2322<br>2539<br>2786                                                                                 | 0<br>53<br>268<br>2290<br>2343<br>2464<br>2642                                                                                 | 0<br>131<br>597<br>2225<br>2330<br>2688<br>2955                                                                                |
| $4f^1$ - $5d^1$ | 33832    296    0.0098<br>41132    243    0.0209<br>44198    226    0.0083<br>45445    220    0.0052<br>52981    189    0.0019 | 37081    270    0.0174<br>41944    239    0.0133<br>44580    224    0.0042<br>45253    221    0.0060<br>50622    198    0.0038 | 30912    324    0.0041<br>40412    248    0.0272<br>44137    227    0.0118<br>45928    218    0.0036<br>55265    181    0.0013 |

**Table S11:** Computed  $\text{Ce}^{3+}$   $4f^1$ - $4f^1$  and  $4f^1$ - $5d^1$  Transition Energies ( $E$ ), Transition Wavelengths ( $\lambda$ ), and Oscillator Strengths ( $f$ ) of  $[\text{Ce}(\text{H}_2\text{O})_6\text{Cl}_2]^+$  with Different Ce-O Bond Distances in Near Square Antiprismatic Geometries as in the Isotypic  $[\text{Y}(\text{H}_2\text{O})_6\text{Cl}_2]\text{Cl}$  and  $[\text{Pr}(\text{H}_2\text{O})_6\text{Cl}_2]\text{Cl}$  Salts

|                 | model <b>6a</b><br>equilibrium Ce-O<br>distances<br>2×2.468, 2×2.496,<br>2×2.503 Å (mean 2.489<br>Å)<br>Ce-Cl: 2×2.851 Å       | model <b>6b</b><br>reduced Ce-O distances<br>2×2.451, 2×2.479,<br>2×2.486 Å (mean 2.472<br>Å)<br>Ce-Cl: 2×2.833 Å              | model <b>6c</b><br>reduced Ce-O distances<br>2×2.334, 2×2.360,<br>2×2.361 Å (mean 2.352<br>Å)<br>Ce-Cl: 2×2.740 Å              |
|-----------------|--------------------------------------------------------------------------------------------------------------------------------|--------------------------------------------------------------------------------------------------------------------------------|--------------------------------------------------------------------------------------------------------------------------------|
| transition      | $E$ , $\text{cm}^{-1}$ $\lambda$ , nm $f$ , a.u.                                                                               | $E$ , $\text{cm}^{-1}$ $\lambda$ , nm $f$ , a.u.                                                                               | $E$ , $\text{cm}^{-1}$ $\lambda$ , nm $f$ , a.u.                                                                               |
| $4f^1$ - $4f^1$ | 0<br>172<br>409<br>2259<br>2406<br>2600<br>2899                                                                                | 0<br>340<br>483<br>2315<br>2480<br>2683<br>2941                                                                                | 0<br>177<br>479<br>2225<br>2363<br>2708<br>3051                                                                                |
| $4f^1$ - $5d^1$ | 31101    322    0.0184<br>40627    246    0.0048<br>42768    234    0.0002<br>46584    215    0.0167<br>49129    204    0.0044 | 29847    335    0.0180<br>40210    249    0.0081<br>42489    236    0.0018<br>45664    219    0.0100<br>48174    208    0.0053 | 27735    363    0.0164<br>40232    249    0.0061<br>42318    236    0.0005<br>48071    208    0.0182<br>50048    200    0.0048 |

**Table S12:** Computed  $\text{Ce}^{3+}$   $4f^1$ - $4f^1$  and  $4f^1$ - $5d^1$  Transition Energies ( $E$ ), Transition Wavelengths ( $\lambda$ ), and Oscillator Strengths ( $f$ ) for  $[\text{Ce}(\text{H}_2\text{O})_8]^{3+}$  with Square Antiprismatic (SAP) Geometry

|                 | model <b>7a</b><br>SAP geometry<br>Ce-O distances $2.490 \times 8$ Å |                |            | model <b>7b</b><br>SAP geometry<br>Ce-O distances $2.538 \times 8$ Å |                |            | model <b>7c</b><br>perfect SAP geometry <sup>a</sup><br>Ce-O distances $2.551 \times 8$ Å |                |            |
|-----------------|----------------------------------------------------------------------|----------------|------------|----------------------------------------------------------------------|----------------|------------|-------------------------------------------------------------------------------------------|----------------|------------|
| transition      | $E$ , $\text{cm}^{-1}$                                               | $\lambda$ , nm | $f$ , a.u. | $E$ , $\text{cm}^{-1}$                                               | $\lambda$ , nm | $f$ , a.u. | $E$ , $\text{cm}^{-1}$                                                                    | $\lambda$ , nm | $f$ , a.u. |
| $4f^1$ - $4f^1$ | 0                                                                    |                |            | 0                                                                    |                |            | 0                                                                                         |                |            |
|                 | 283                                                                  |                |            | 275                                                                  |                |            | 72                                                                                        |                |            |
|                 | 387                                                                  |                |            | 342                                                                  |                |            | 191                                                                                       |                |            |
|                 | 2338                                                                 |                |            | 2349                                                                 |                |            | 2331                                                                                      |                |            |
|                 | 2476                                                                 |                |            | 2447                                                                 |                |            | 2338                                                                                      |                |            |
|                 | 2525                                                                 |                |            | 2530                                                                 |                |            | 2365                                                                                      |                |            |
|                 | 2895                                                                 |                |            | 2839                                                                 |                |            | 2568                                                                                      |                |            |
| $4f^1$ - $5d^1$ | 32138                                                                | 311            | 0.0204     | 33353                                                                | 300            | 0.0201     | 35592                                                                                     | 281            | 0.0231     |
|                 | 41928                                                                | 239            | 0.0029     | 42079                                                                | 238            | 0.0028     | 41913                                                                                     | 239            | 0.0028     |
|                 | 44067                                                                | 227            | 0.0001     | 44222                                                                | 226            | 0.0000     | 44076                                                                                     | 227            | 0.0000     |
|                 | 47952                                                                | 209            | 0.0175     | 47701                                                                | 210            | 0.0174     | 46620                                                                                     | 215            | 0.0155     |
|                 | 49119                                                                | 204            | 0.0035     | 48798                                                                | 205            | 0.0031     | 47697                                                                                     | 210            | 0.0031     |

<sup>a</sup> The H atom positions are constrained to satisfied the SAP structure but O-H distances and H-O-H angles are optimized at the MP2 level.

**Table S13:** QTAIM charge ( $Q(M)$ ) and the ratio  $d(\text{Ce-BCP})/d(\text{Ce-L})$ , the electron density ( $\rho_b$ ), Laplacian ( $\nabla^2\rho_b$ ), and the energy density ( $H_b$ ) at the An-X (Cl, O) bond critical point.

|                                                                   |                            | $Q(M)$ | $d(\text{Ce-BCP})/d(\text{Ce-L})$ % | $\rho_b$<br>[e <sup>-</sup><br>/bohr <sup>3</sup> ] | $\nabla^2\rho_b$<br>[e <sup>-</sup><br>/bohr <sup>5</sup> ] | $H_b$<br>[a.u.] |
|-------------------------------------------------------------------|----------------------------|--------|-------------------------------------|-----------------------------------------------------|-------------------------------------------------------------|-----------------|
| [Ce(H <sub>2</sub> O) <sub>9</sub> ] <sup>3+</sup>                | Ce-<br>O <sub>capped</sub> | 2.43   | 50                                  | 0.037                                               | 0.146                                                       | 0.0015          |
|                                                                   | Ce-O <sub>prism</sub>      |        |                                     | 0.039                                               | 0.152                                                       | 0.0011          |
| [*Ce(H <sub>2</sub> O) <sub>9</sub> ] <sup>3+</sup>               | Ce-<br>O <sub>capped</sub> | 2.43   | 50                                  | 0.041                                               | 0.133                                                       | -0.0015         |
|                                                                   | Ce-O <sub>prism</sub>      |        |                                     | 0.039                                               | 0.153                                                       | -0.0001         |
| [Ce(H <sub>2</sub> O) <sub>7</sub> Cl <sub>2</sub> ] <sup>+</sup> | Ce-Cl                      | 2.28   | 50                                  | 0.046                                               | 0.103                                                       | 0.0065          |
|                                                                   | Ce-O                       |        | 54                                  | 0.039                                               | 0.151                                                       | -0.0008         |
| [Ce(H <sub>2</sub> O) <sub>8</sub> ] <sup>3+</sup>                | Ce-O                       | 2.44   | 54                                  | 0.041                                               | 0.156                                                       | 0.0004          |
| [Ce(H <sub>2</sub> O) <sub>7</sub> Cl] <sup>2+</sup>              | Ce-Cl                      | 2.33   | 50                                  | 0.049                                               | 0.104                                                       | -0.0083         |
|                                                                   | Ce-O                       |        | 54                                  | 0.046                                               | 0.178                                                       | -0.0007         |

**Table S14:** Natural bond orbital (NBO) population and charge analysis for the ground-state (GS) and first excited state (ES) of Ce(III) aqua and aqua-chloro complexes. DFT and TD-DFT Calculations were performed using the PBE0 functional. The populations are expressed in electron units.

| Complex                                                                               | Excited state | Ce populations                                                                                                    | Ce Charge |
|---------------------------------------------------------------------------------------|---------------|-------------------------------------------------------------------------------------------------------------------|-----------|
| [Ce(H <sub>2</sub> O) <sub>8</sub> ] <sup>3+</sup> (SAP)                              | GS            | 6s <sup>0.12</sup> 4f <sup>1.07</sup> 5d <sup>0.60</sup> 6p <sup>0.24</sup> 5f <sup>0.04</sup> 6d <sup>0.02</sup> | 1.91      |
| [*Ce(H <sub>2</sub> O) <sub>8</sub> ] <sup>3+</sup> (dist. SAP)                       | ES            | 6s <sup>0.14</sup> 4f <sup>0.16</sup> 5d <sup>1.63</sup> 6p <sup>0.24</sup> 5f <sup>0.02</sup> 6d <sup>0.07</sup> | 1.72      |
| [Ce(H <sub>2</sub> O) <sub>9</sub> ] <sup>3+</sup> (TTP)                              | GS            | 6s <sup>0.14</sup> 4f <sup>1.08</sup> 5d <sup>0.70</sup> 6p <sup>0.30</sup> 5f <sup>0.05</sup> 6d <sup>0.02</sup> | 1.72      |
| [*Ce(H <sub>2</sub> O) <sub>8</sub> ] <sup>3+</sup> ·H <sub>2</sub> O                 | ES            | 6s <sup>0.15</sup> 4f <sup>0.38</sup> 5d <sup>1.64</sup> 6p <sup>0.31</sup> 5f <sup>0.06</sup> 6d <sup>0.11</sup> | 1.33      |
| [Ce(H <sub>2</sub> O) <sub>7</sub> Cl <sub>2</sub> ] <sup>1+</sup>                    | GS            | 6s <sup>0.18</sup> 4f <sup>1.10</sup> 5d <sup>1.01</sup> 6p <sup>0.43</sup> 5f <sup>0.07</sup> 6d <sup>0.04</sup> | 1.17      |
| [*Ce(H <sub>2</sub> O) <sub>6</sub> Cl <sub>2</sub> ] <sup>1+</sup> ·H <sub>2</sub> O | ES            | 6s <sup>0.19</sup> 4f <sup>0.39</sup> 5d <sup>1.90</sup> 6p <sup>0.40</sup> 5f <sup>0.05</sup> 6d <sup>0.14</sup> | 0.86      |

**Table S15:** Computed Ce<sup>3+</sup> 4f<sup>1</sup>-4f<sup>1</sup> and 4f<sup>1</sup>-5d<sup>1</sup> Transition Energies ( $E$ ), Transition Wavelengths ( $\lambda$ ), and Oscillator Strengths ( $f$ ) of [Ce(H<sub>2</sub>O)<sub>9</sub>]<sup>3+</sup> and [Ce(H<sub>2</sub>O)<sub>8</sub>]<sup>3+</sup>(H<sub>2</sub>O) for geometries optimized at the PBE0 level of theory.

| emission spectrum<br>trigonal prism geometry, $D_{3h}$<br>Ce-O distances (Å) $3 \times 2.586$ ; $6 \times 2.565$ |                |            | emission spectrum<br>[Ce(H <sub>2</sub> O) <sub>9</sub> ] <sup>3+</sup><br>tricapped trigonal prism geometry, $D_{3h}$<br>symmetry<br>Ce-O distances (Å) $3 \times 2.586$ ; $6 \times 2.565$ |                        |                |            | emission spectrum<br>[Ce(H <sub>2</sub> O) <sub>8</sub> ] <sup>3+</sup> (H <sub>2</sub> O)<br>bicapped trigonal prismatic geometry,<br>symmetry<br>Ce-O mean distances (Å) $6 \times 2.547$ , $2 \times 2.514$ , $1 \times 4.328$ |                        |                |
|------------------------------------------------------------------------------------------------------------------|----------------|------------|----------------------------------------------------------------------------------------------------------------------------------------------------------------------------------------------|------------------------|----------------|------------|-----------------------------------------------------------------------------------------------------------------------------------------------------------------------------------------------------------------------------------|------------------------|----------------|
| $E$ , cm <sup>-1</sup>                                                                                           | $\lambda$ , nm | $f$ , a.u. | transition                                                                                                                                                                                   | $E$ , cm <sup>-1</sup> | $\lambda$ , nm | $f$ , a.u. | transition                                                                                                                                                                                                                        | $E$ , cm <sup>-1</sup> | $\lambda$ , nm |
| 0                                                                                                                |                |            | 4f <sup>1</sup> -5d <sup>1</sup>                                                                                                                                                             | 40255                  | 249            | 0.0009     | 4f <sup>1</sup> -5d <sup>1</sup>                                                                                                                                                                                                  | 33451                  | 299            |
| 27                                                                                                               |                |            |                                                                                                                                                                                              | 40131                  | 249            | 0.0015     |                                                                                                                                                                                                                                   | 33236                  | 301            |
| 225                                                                                                              |                |            |                                                                                                                                                                                              | 40034                  | 250            | 0.0024     |                                                                                                                                                                                                                                   | 33097                  | 302            |
| 2284                                                                                                             |                |            |                                                                                                                                                                                              | 37971                  | 263            | 0.0139     |                                                                                                                                                                                                                                   | 31126                  | 321            |
| 2408                                                                                                             |                |            |                                                                                                                                                                                              | 37850                  | 264            | 0.0227     |                                                                                                                                                                                                                                   | 31028                  | 322            |
| 2505                                                                                                             |                |            |                                                                                                                                                                                              | 37752                  | 265            | 0.0000     |                                                                                                                                                                                                                                   | 30940                  | 323            |
| 2591                                                                                                             |                |            |                                                                                                                                                                                              | 37667                  | 266            | 0.0000     |                                                                                                                                                                                                                                   | 30629                  | 327            |
| 40259                                                                                                            | 249            | 0.0000     |                                                                                                                                                                                              |                        |                |            |                                                                                                                                                                                                                                   |                        |                |
| 40739                                                                                                            | 246            | 0.0428     |                                                                                                                                                                                              |                        |                |            |                                                                                                                                                                                                                                   |                        |                |
| 42886                                                                                                            | 233            | 0.0023     |                                                                                                                                                                                              |                        |                |            |                                                                                                                                                                                                                                   |                        |                |
| 45820                                                                                                            | 218            | 0.0000     |                                                                                                                                                                                              |                        |                |            |                                                                                                                                                                                                                                   |                        |                |
| 46736                                                                                                            | 214            | 0.0008     |                                                                                                                                                                                              |                        |                |            |                                                                                                                                                                                                                                   |                        |                |

**Table S16:** Computed  $\text{Ce}^{3+}$   $4f^1$ - $4f^1$  and  $4f^1$ - $5d^1$  Transition Energies ( $E$ ), Transition Wavelengths ( $\lambda$ ), and Oscillator Strengths ( $f$ ) of  $[\text{Ce}(\text{H}_2\text{O})_7\text{Cl}_2]^+$  and  $[\text{Ce}(\text{H}_2\text{O})_6\text{Cl}_2]^+(\text{H}_2\text{O})$  for geometries optimized at the PBE0 level of theory.

| absorption spectrum<br>$[\text{Ce}(\text{H}_2\text{O})_7\text{Cl}_2]^+$<br>Ce-O distances (Å) $2 \times 2.536$ ; $3 \times 2.579$ ; $2 \times 2.595$<br>Ce-Cl distances (Å) $2 \times 2.667$ |                        |                |            | emission spectrum<br>$[\text{Ce}(\text{H}_2\text{O})_6\text{Cl}_2]^+(\text{H}_2\text{O})$<br>Ce-O distances (Å) $1 \times 2.439$ ; $4 \times 2.497$ ; $1 \times 2.601$ ;<br>Ce-Cl distances (Å) $2 \times 2.648$ |                        |                |            |
|----------------------------------------------------------------------------------------------------------------------------------------------------------------------------------------------|------------------------|----------------|------------|------------------------------------------------------------------------------------------------------------------------------------------------------------------------------------------------------------------|------------------------|----------------|------------|
| transition                                                                                                                                                                                   | $E$ , $\text{cm}^{-1}$ | $\lambda$ , nm | $f$ , a.u. | transition                                                                                                                                                                                                       | $E$ , $\text{cm}^{-1}$ | $\lambda$ , nm | $f$ , a.u. |
| $4f^1$ - $4f^1$                                                                                                                                                                              | 0                      |                |            | $4f^1$ - $5d^1$                                                                                                                                                                                                  | 26802                  | 373            | 0.0174     |
|                                                                                                                                                                                              | 66                     |                |            |                                                                                                                                                                                                                  | 26330                  | 380            | 0.0074     |
|                                                                                                                                                                                              | 289                    |                |            |                                                                                                                                                                                                                  | 26072                  | 384            | 0.0002     |
|                                                                                                                                                                                              | 2270                   |                |            |                                                                                                                                                                                                                  | 24440                  | 409            | 0.0152     |
|                                                                                                                                                                                              | 2342                   |                |            |                                                                                                                                                                                                                  | 24262                  | 412            | 0.0048     |
|                                                                                                                                                                                              | 2484                   |                |            |                                                                                                                                                                                                                  | 23832                  | 420            | 0.0000     |
|                                                                                                                                                                                              | 2656                   |                |            |                                                                                                                                                                                                                  | 23663                  | 423            | 0.0001     |
|                                                                                                                                                                                              |                        |                |            |                                                                                                                                                                                                                  |                        |                |            |
| $4f^1$ - $5d^1$                                                                                                                                                                              | 38601                  | 259            | 0.0170     |                                                                                                                                                                                                                  |                        |                |            |
|                                                                                                                                                                                              | 38872                  | 257            | 0.0179     |                                                                                                                                                                                                                  |                        |                |            |
|                                                                                                                                                                                              | 42053                  | 238            | 0.0096     |                                                                                                                                                                                                                  |                        |                |            |
|                                                                                                                                                                                              | 42620                  | 235            | 0.0028     |                                                                                                                                                                                                                  |                        |                |            |
|                                                                                                                                                                                              | 45294                  | 221            | 0.0007     |                                                                                                                                                                                                                  |                        |                |            |

**Table S17.** Computed  $\text{Ce}^{3+}$   $4f^1$ - $4f^1$  and  $4f^1$ - $5d^1$  transition energies (in  $\text{cm}^{-1}$ ) at the CASCSF level for  $[\text{Ce}(\text{H}_2\text{O})_9]^{3+}(\text{H}_2\text{O})_{n=0,18}$  with ( $n = 18$ ) and without ( $n = 0$ ) explicit second hydration shell

|                 | $[\text{Ce}(\text{H}_2\text{O})_9]^{3+}$ | $[\text{Ce}(\text{H}_2\text{O})_9]^{3+}$ | $[\text{Ce}(\text{H}_2\text{O})_9]^{3+}(\text{H}_2\text{O})_{18}$ | $[\text{Ce}(\text{H}_2\text{O})_9]^{3+}(\text{H}_2\text{O})_{18}$ |
|-----------------|------------------------------------------|------------------------------------------|-------------------------------------------------------------------|-------------------------------------------------------------------|
|                 | gas-phase                                | PCM                                      | gas-phase                                                         | PCM                                                               |
| $4f^1$ - $4f^1$ | 0                                        | 0                                        | 0                                                                 | 0                                                                 |
|                 | 290                                      | 227                                      | 207                                                               | 215                                                               |
|                 | 461                                      | 425                                      | 422                                                               | 426                                                               |
|                 | 464                                      | 432                                      | 425                                                               | 429                                                               |
|                 | 497                                      | 441                                      | 430                                                               | 437                                                               |
|                 | 497                                      | 449                                      | 430                                                               | 439                                                               |
|                 | 703                                      | 696                                      | 696                                                               | 695                                                               |
| $4f^1$ - $5d^1$ | 42495                                    | 42247                                    | 42139                                                             | 42120                                                             |
|                 | 44809                                    | 44898                                    | 44937                                                             | 44924                                                             |
|                 | 44909                                    | 45018                                    | 45036                                                             | 45021                                                             |
|                 | 47383                                    | 47233                                    | 47231                                                             | 47224                                                             |
|                 | 47405                                    | 47266                                    | 47254                                                             | 47239                                                             |

**Table S18.** Computed  $\text{Ce}^{3+}$   $4f^1$ - $4f^1$  and  $4f^1$ - $5d^1$  spin-free Transition Energies ( $E$ ) for  $[\text{Ce}(\text{H}_2\text{O})_9]^{3+}$  at the MS-CASPT2 and TD-DFT levels using PBE0 functional with PCM non Eq.

|                 | MS-CASPT2 | TD-DFT PBE0 |
|-----------------|-----------|-------------|
| $4f^1$ - $4f^1$ | 42        | 2348        |
|                 | 53        | 2361        |
|                 | 74        | 2479        |
|                 | 233       | 4872        |
|                 | 365       | 5251        |
|                 | 417       | 5260        |
| $4f^1$ - $5d^1$ | 40472     | 42308       |
|                 | 41483     | 43465       |
|                 | 41501     | 43632       |
|                 | 45355     | 47308       |
|                 | 45375     | 47344       |

### 3. References

- (1) (a) Albertsson, J.; Elding, L. I. The Geometry of the Nona-aqualanthanoid(3+) Complex in the Solid Bromates and Ethyl Sulphates. *Acta Crystallogr. B* **1979**, *33*, 1460-1469. (b) Abbasi, A.; Lindqvist-Reis, P.; Eriksson, L.; Sandström, D.; Lidin, S.; Persson, I.; Sandström, M. Highly Hydrated Cations: Deficiency, Mobility, and Coordination of Water in Crystalline Nonahydrated Scandium(III), Yttrium(III), and Lanthanoid(III) Trifluoromethanesulfonates. *Chem. Eur. J.* **2005**, *11*, 4065–4077. (c) Habenschuss, A.; Spedding, F. H. di- $\mu$ -chloro-bis[hepta-aqualanthanum(III)] tetrachloride  $[(\text{H}_2\text{O})_7\text{La}_2(\text{H}_2\text{O})_7]\text{Cl}_4$  *Cryst. Struct. Commun.* **1979**, *8*, 511–516. (d) Rogers, R. D.; Kurihara, L. K. f-Element/Crown Ether Complexes. 1. Synthesis and structure of  $[\text{Y}(\text{OH}_2)_8]\text{Cl}_3 \cdot (15\text{-crown-5})$ . *Inorg. Chim. Acta* **1986**, *116*, 171–177. (e) Bell, A. M. T.; Smith, A. J. *Acta Crystallogr. C* **1990**, *46*, 960–962.
- (2) *CrysAlis PRO*, Agilent Technologies, Version 1.171.36.20 (Release 27-06-2012 CrysAlis171 .NET) (compiled Jul 11 2012,15:38:31); Program(s) Used to Refine Structure: *SHELXL2018/1* (Sheldrick, 2018).
- (3) Adamo, C.; Barone, V. Toward Reliable Density Functional Methods without Adjustable Parameters: The PBE0 Model *J. Chem. Phys.* **1999**, *110*, 6158-6169.
- (4) Furche, F.; Ahlrichs, R. Adiabatic Time-Dependent Density Functional Methods for Excited State Properties. *Chem. Phys.* **2002**, *117*, 74337447.
- (5) Hättig, C.; Hellweg, A.; Köhn, A. Distributed Memory Parallel Implementation of Energies and Gradients for Second-Order Møller–Plesset Perturbation Theory with the Resolution-of-the-Identity Approximation. *Phys. Chem. Chem. Phys.* **2006**, *8*, 1159-1169; b) Hättig, C.; Weigend, F. CC2 Excitation Energy Calculations on Large Molecules Using the Resolution of the Identity Approximation. *J. Chem. Phys.* **2000**, *113*, 5154-5161.
- (6) Weigend, F.; Köhn, A.; Hättig, C. Efficient Use of the Correlation Consistent Basis Sets in Resolution of the Identity MP2 Calculations. *J. Chem. Phys.* **2002**, *116*, 3175-3183.
- (7) Hättig, C. Optimization of Auxiliary Basis Sets for RI-MP2 and RI-CC2 Calculations: Core–Valence and Quintuple- $\zeta$  Basis Sets for H to Ar and QZVPP Basis Sets for Li to Kr. *Phys. Chem. Chem. Phys.* **2005**, *7*, 59-66.
- (8) Andersson, K.; Malmqvist, P.-Å.; Roos, B. O.; Sadlej, A. J.; Wolinski, K. Second-Order Perturbation Theory with a CASSCF Reference Function. *J. Phys. Chem.*, **1990**, *94*, 5483.
- (9) Andersson, K.; Malmqvist P.-Å., Roos, B. O. Second-Order Perturbation Theory with a Complete Active Space Self-Consistent Field Reference Function. *J. Chem. Phys.*, **1992**, *96*, 1218.
- (10) Finley, J.; Malmqvist, P.-Å.; Roos, B. O. Serrano-Andrés, L. The Multi-State CASPT2 Method. *Chem. Phys. Lett.*, **1998**, *288*, 299-306.
- (11) Dolg, M.; Stoll, H.; Preuss, H. Energy-Adjusted Ab Initio Pseudopotentials for the Rare Earth Elements. *J. Chem. Phys.* **1989**, *90*, 1730.
- (12) Cao, X.; Dolg, M. Segmented Contraction Scheme for Small-core Lanthanide Pseudopotential Basis Sets. *J. Mol. Struct. Theochem.* **2002**, *581*, 139-147.

- (13) Woon, D.E.; Dunning, T.H. Jr. Gaussian Basis Sets for Use in Correlated Molecular Calculations. IV. Calculation of Static Electrical Response Properties. *J. Chem. Phys.* **1994**, *100*, 2975.
- (14) Dunning, T.H. Jr. Gaussian Basis Sets for Use in Correlated Molecular Calculations. I. The Atoms Boron Through Neon and Hydrogen. *J. Chem. Phys.* **1989**, *90*, 1007.
- (15) TURBOMOLE V7.1 2016, a development of University of Karlsruhe and Forschungszentrum Karlsruhe GmbH, 1989-2007, TURBOMOLE GmbH, since 2007; available from <http://www.turbomole.com>.
- (16) Douglas M.; Kroll, N. M. *Ann. Phys.*, **1974**, *82*, 89; Hess, B. A. Relativistic Electronic-Structure Calculations Employing a Two-Component No-Pair Formalism with External-Field Projection Operators. *Phys. Rev. A* **1986**, *33*, 3742.
- (17) Ghido, G.; Roos, B. O.; Malmqvist, P.-Å. A Modified Definition of the Zeroth-Order Hamiltonian in Multiconfigurational Perturbation Theory (CASPT2). *Chem. Phys. Lett.* **2004**, *396*, 142-149.
- (18) Målqvist, P.-A.; Roos, B. O.; Schimmelpfennig, B. The Restricted Active Space (RAS) State Interaction Approach with Spin-Orbit Coupling. *Chem. Phys. Lett.* **2002**, *357*, 230-240.
- (19) Heß, B. A.; Marian, C. M.; Wahlgren, U.; Gropen, O. A mean-field spin-orbit method applicable to correlated wavefunctions. *Chem. Phys. Lett.* **1996**, *251*, 365-371.
- (20) Schimmelpfennig, B. AMFI, an Atomic Mean-Field Integral Program.
- (21) Aquilante, F.; Autschbach, J.; Carlson, R. K.; Chibotaru, L. F.; Delcey, M. G.; De Vico, L.; Fdez Galván, I.; Ferré, N.; Frutos, L. M.; Gagliardi, L.; Garavelli, M.; Giussani, A.; Hoyer, C. E.; Li Manni, G.; Lischka, H.; Ma, D.; Malmqvist, P.-A.; Müller, T.; Nenov, A.; Olivucci, M.; Pedersen, T. B.; Peng, D.; Plasser, F.; Pritchard, B.; Reiher, M.; Rivalta, I.; Schapiro, I.; Segarra-Mart, J.; Stenrup, M.; Truhlar, D. G.; Ungur, L.; Valentini, A.; Vancollie, S.; Veryazov, V.; Vysotskiy, V. P.; Weingart, O.; Zapata, F.; Lindh, R. Molcas 8: New Capabilities for Multiconfigurational Quantum Chemical Calculations Across the Periodic Table. *J. Comput. Chem.* **2016**, *37*, 506.
- (22) Barone V.; Cossi. M. Quantum Calculation of Molecular Energies and Energy Gradients in Solution by a Conductor Solvent Model *J. Phys. Chem. A* **1998**, *102*, 1995-2001.
- (23) Cossi, M.; Rega, N.; Scalmani, G.; Barone. V. Polarizable dielectric model of solvation with inclusion of charge penetration effects. *J. Chem. Phys.* **2001**, *114*, 5691.
- (24) Gaussian 09, Revision E.01, M. J. Frisch, G. W. Trucks, H. B. Schlegel, G. E. Scuseria, M. A. Robb, J. R. Cheeseman, G. Scalmani, V. Barone, G. A. Petersson, H. Nakatsuji, X. Li, M. Caricato, A. Marenich, J. Bloino, B. G. Janesko, R. Gomperts, B. Mennucci, H. P. Hratchian, J. V. Ortiz, A. F. Izmaylov, J. L. Sonnenberg, D. Williams-Young, F. Ding, F. Lipparini, F. Egidi, J. Goings, B. Peng, A. Petrone, T. Henderson, D. Ranasinghe, V. G. Zakrzewski, J. Gao, N. Rega, G. Zheng, W. Liang, M. Hada, M. Ehara, K. Toyota, R. Fukuda, J. Hasegawa, M. Ishida, T. Nakajima, Y. Honda, O. Kitao, H. Nakai, T. Vreven, K. Throssell, J. A. Montgomery, Jr., J. E. Peralta, F. Ogliaro, M. Bearpark, J. J. Heyd, E. Brothers, K.



- N. Kudin, V. N. Staroverov, T. Keith, R. Kobayashi, J. Normand, K. Raghavachari, A. Rendell, J. C. Burant, S. S. Iyengar, J. Tomasi, M. Cossi, J. M. Millam, M. Klene, C. Adamo, R. Cammi, J. W. Ochterski, R. L. Martin, K. Morokuma, O. Farkas, J. B. Foresman, and D. J. Fox, Gaussian, Inc., Wallingford CT, 2016.
- (25) AIMAll (Version 12.06.21), Todd A. Keith, TK Gristmill Software, Overland Park KS, USA, 2012 (aim.tkgristmill.com).
- (26) Miyakawa, K.; Kaizu, Y.; Kobayashi, H. An Electrostatic Approach to the Structure of Hydrated Lanthanoid Ions.  $[M(OH_2)_9]^{3+}$  versus  $[M(OH_2)_8]^{3+}$ . *J. Chem. Soc. Faraday Trans. 1* **1988**, *84*, 1517-1529.
- (27) Lindqvist-Reis, P.; Klenze, R.; Schubert, G.; Fanghänel, T. Hydration of  $Cm^{3+}$  in Aqueous Solution from 20 to 200 °C. A Time-Resolved Laser Fluorescence Spectroscopy Study *J. Phys. Chem. B* **2005**, *109*, 3077-3083.
